# Supplementary material for: Flexible direct synthesis of phosphorus-rich CoP3 on carbon black and its examination in hydrogen evolution electrocatalysis
Source: Royal Society of Chemistry journal article supplement (doi:10.1039/d3ya00295k), 2023-01-01
Supplement: d3ya00295k1.pdf [file d3ya00295k1.pdf]

Supporting Information for:

**Flexible Direct Synthesis of Phosphorus-Rich CoP<sub>3</sub> on Carbon Black  
and its Examination in Hydrogen Evolution Electrocatalysis**

Ishanka A. Liyanage, Hannah Barmore, Edward G. Gillan\*  
University of Iowa, Department of Chemistry, Iowa City, Iowa 52242 USA

E-mail: edward-gillan@uiowa.edu

ORCID (Edward G. Gillan): 0000-0002-2047-0929

ORCID (Ishanka A. Liyanage) 0000-0003-4814-0099

**Table of Contents (Tables and Figures are listed in the order they appear in the main text)**

**Figure S1.** Images of electrochemical cell, coned, 50% graphite carbon wax electrode tips, brass current collector, working electrode and tip geometries for XRD and SEM-EDS.

**Figure S2.** XRD results of 25-CoCl<sub>2</sub>/C product after methanol evaporation followed by heated evacuation.

**Figure S3.** XRD results of targeted 5-CoP<sub>3</sub>/C reaction using 3-fold excess phosphorus to stoichiometric amounts.

**Figure S4.** XRD results of pristine carbon black, annealed carbon black and annealed carbon black with excess phosphorous at 500 °C for 48 hours.

**Figure S5.** Raman spectra of CoP<sub>3</sub>, x-CoP<sub>3</sub>/C (x = 5,10, 25 mol%) and annealed carbon black with and without excess P in the zoomed in region of 200-500 cm<sup>-1</sup>.

**Figure S6.** EDS elemental maps of (A) CoP<sub>3</sub> (B) 25-CoP<sub>3</sub>/C.

**Figure S7.** EDS elemental maps of (C) 10-CoP<sub>3</sub>/C (D) 5-CoP<sub>3</sub>/C.

**Figure S8.** EDS elemental (A) map and (B) analysis of annealed carbon black with excess phosphorus.

**Figure S9.** 50-point BET full isotherms of annealed carbon black with or without excess phosphorus, CoP<sub>3</sub> and x-CoP<sub>3</sub>/C (x mol% = 5, 10, 25) materials.

**Figure S10.** iR uncompensated and 85% iR compensated LSV overlay HER results for CoP<sub>3</sub>.

**Figure S11.** iR uncompensated and 85% iR compensated LSV overlay HER results for 25-CoP<sub>3</sub>/C.

**Figure S12.** iR uncompensated and 85% iR compensated LSV overlay HER results for 10-CoP<sub>3</sub>/C.

**Figure S13.** iR uncompensated and 85% iR compensated LSV overlay HER results for 5-CoP<sub>3</sub>/C.

**Figure S14.** iR uncompensated and 85% iR compensated LSV overlay HER results for annealed carbon black with excess phosphorus.

**Figure S15.** Representative 85% iR compensated LSV overlay plot of HER results for CoP<sub>3</sub>, x-CoP<sub>3</sub>/C (x = 5, 10, 25 mol%) and annealed carbon black with excess phosphorus.

**Figure S16.** Analysis of scan rate data from CV runs to calculate ECSA values before and after 50 LSV scans (iR uncompensated) for CoP<sub>3</sub> and 25-CoP<sub>3</sub>/C materials.

**Figure S17.** Analysis of scan rate data from CV runs to calculate ECSA values before and after 50 LSV scans (iR uncompensated) for 10-CoP<sub>3</sub>/C and 5-CoP<sub>3</sub>/C materials.

**Figure S18.** 18-hour constant potential chronoamperometry (CA) HER experiments for CoP<sub>3</sub> and x-CoP<sub>3</sub>/C (x = 5, 10, 25 mol%) catalysts using platinum counter experiments.

**Figure S19.** 18-hour constant potential chronoamperometry (CA) HER experiments for CoP<sub>3</sub> and x-CoP<sub>3</sub>/C (x = 5, 10, 25 mol%) catalysts using graphite counter experiments.

**Figure S20.** XRD results of CoP<sub>3</sub>, and 25-CoP<sub>3</sub>/C materials embedded on C<sub>wax</sub> tips before and after 18-hour constant potential chronoamperometry (CA) HER experiments.

**Figure S21.** XRD results of 10-CoP<sub>3</sub>/C and 5-CoP<sub>3</sub>/C materials embedded on C<sub>wax</sub> tips before and after 18-hour constant potential chronoamperometry (CA) HER experiments.

**Figure S22.** SEM images of CoP<sub>3</sub> and x-CoP<sub>3</sub>/C materials embedded on C<sub>wax</sub> after 18-hour CA HER experiments.

**Figure S23.** EDS maps of (A) CoP<sub>3</sub> (B) 25-CoP<sub>3</sub>/C embedded on C<sub>wax</sub> after 18-hour CA HER experiments.

**Figure S24.** EDS maps of (C) 10-CoP<sub>3</sub>/C (D) 5-CoP<sub>3</sub>/C embedded on C<sub>wax</sub> after 18-hour CA HER experiments.

**Table S1.** EDS compositional analysis of CoP<sub>3</sub> and x-CoP<sub>3</sub>/C materials embedded on C<sub>wax</sub> tips after 18-hour constant potential chronoamperometry (CA) HER experiments.

**Figure S25.** Raman spectra of CoP<sub>3</sub> and 25-CoP<sub>3</sub>/C materials embedded on C<sub>wax</sub> tips before and after 18-hour constant potential chronoamperometry (CA) HER experiments in the region of 200-2000 cm<sup>-1</sup>.

**Figure S26.** Raman spectra of CoP<sub>3</sub> and 25-CoP<sub>3</sub>/C materials embedded on C<sub>wax</sub> tips before and after 18-hour constant potential chronoamperometry (CA) HER experiments in the region of 200-500 cm<sup>-1</sup>.

**Table S2.** Literature comparison table for carbon-supported cobalt phosphides HER in 0.5 M H<sub>2</sub>SO<sub>4</sub>.

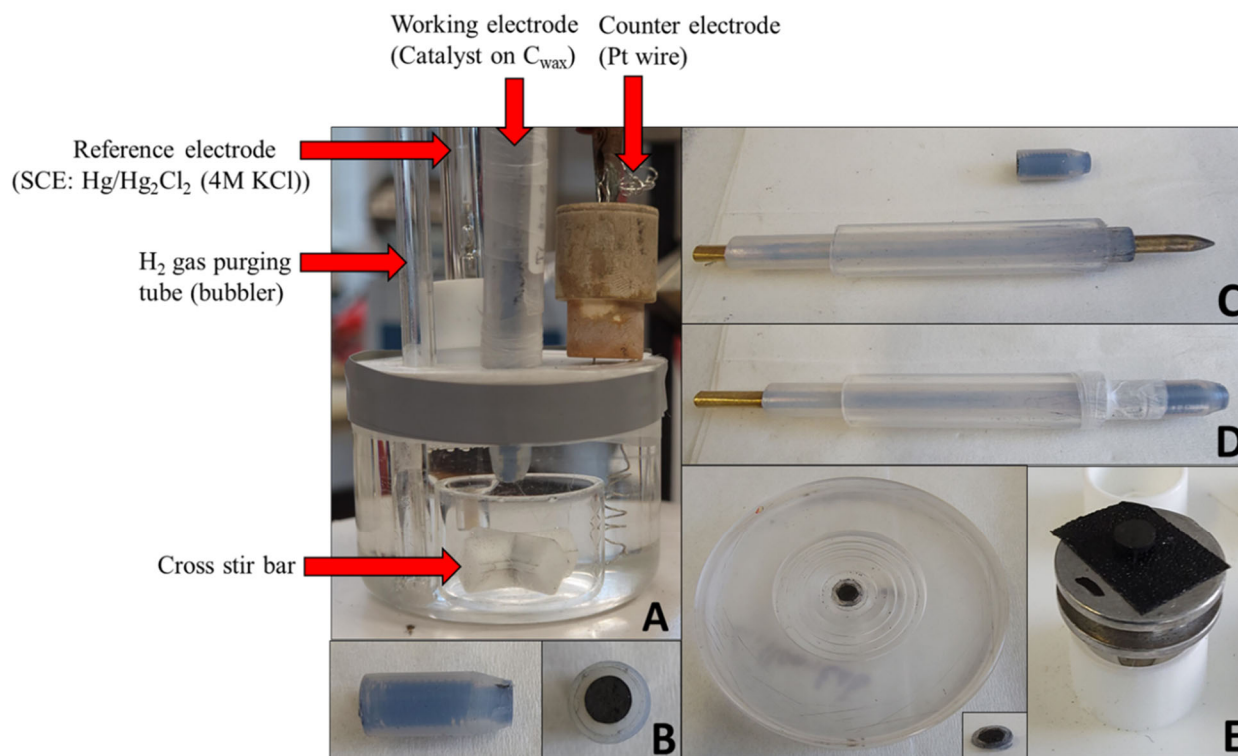

**Figure S1.** Images of electrochemical cell and working electrode: (A) Three electrode, single compartment cell, (B) coned, C<sub>wax</sub> electrode tip in different geometries, (C) disassembled C<sub>wax</sub> electrode tip + brass current collector, (D) assembled C<sub>wax</sub> working electrode, and (E) cut slice C<sub>wax</sub> tip geometries for post electrochemical XRD and SEM-EDS analysis.

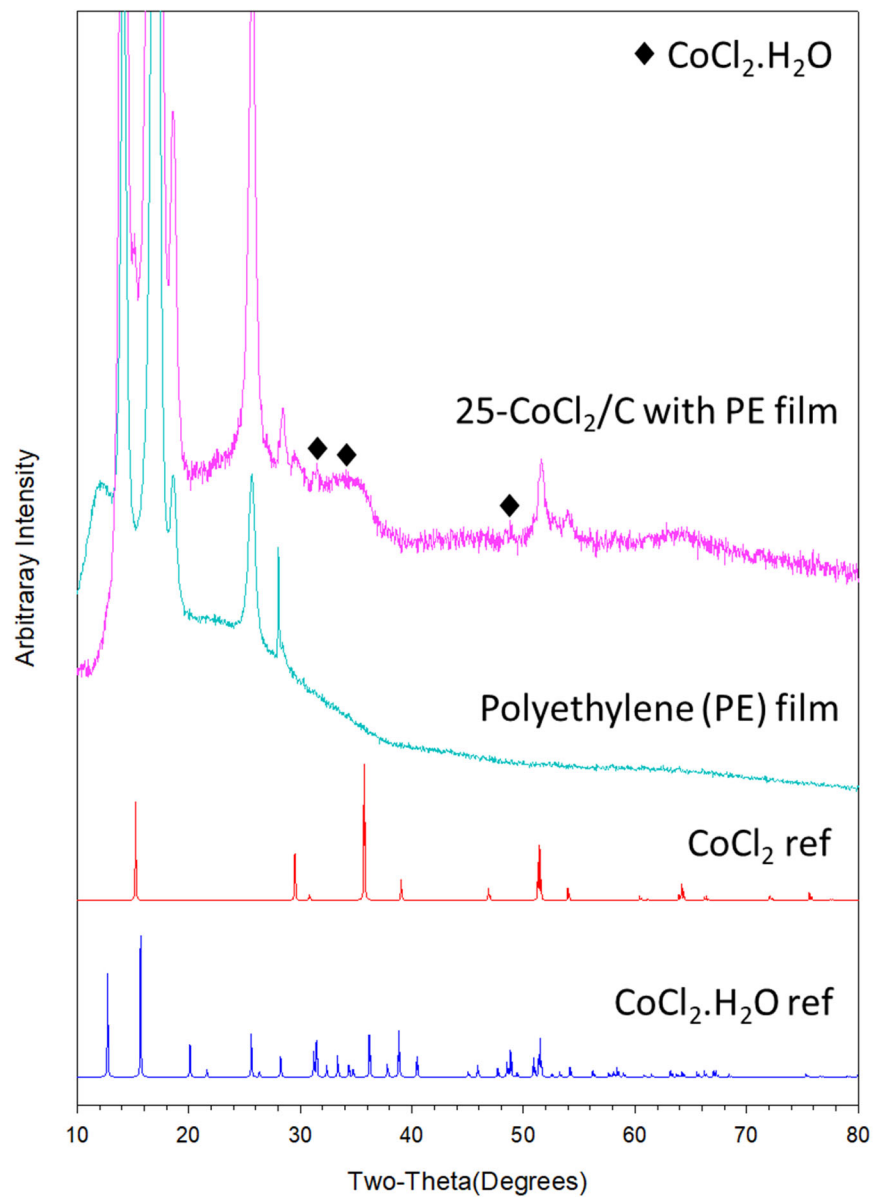

**Figure S2.** XRD results of 25-CoCl<sub>2</sub>/C (25 mol% CoCl<sub>2</sub> deposited onto carbon black) product after methanol evaporation followed by heated evacuation (180 ° C, 15 min).



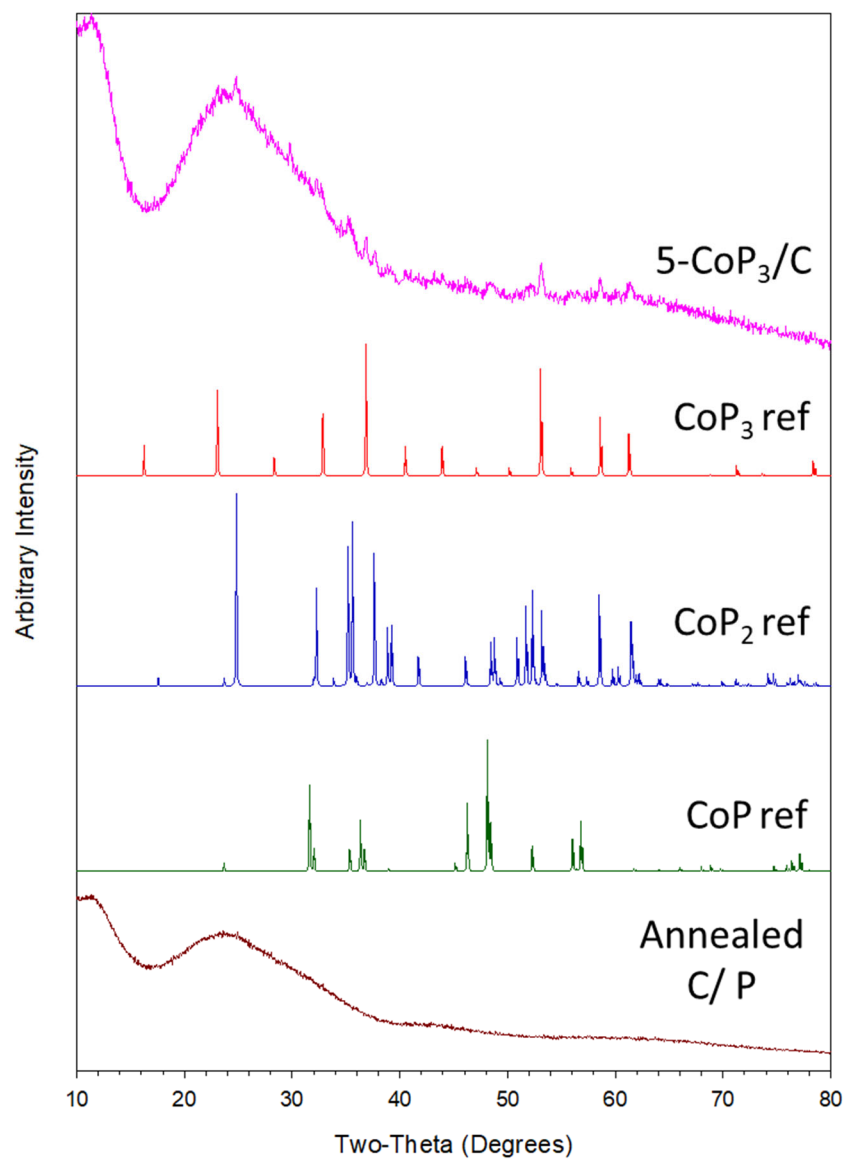

**Figure S3.** XRD results of targeted 5-CoP<sub>3</sub>/C reaction using 3-fold excess phosphorus relative to stoichiometric amounts. The 5-CoP<sub>3</sub>/C composite and carbon black (C/P) were annealed with 3-fold excess phosphorus at 500 °C for 48 hours.

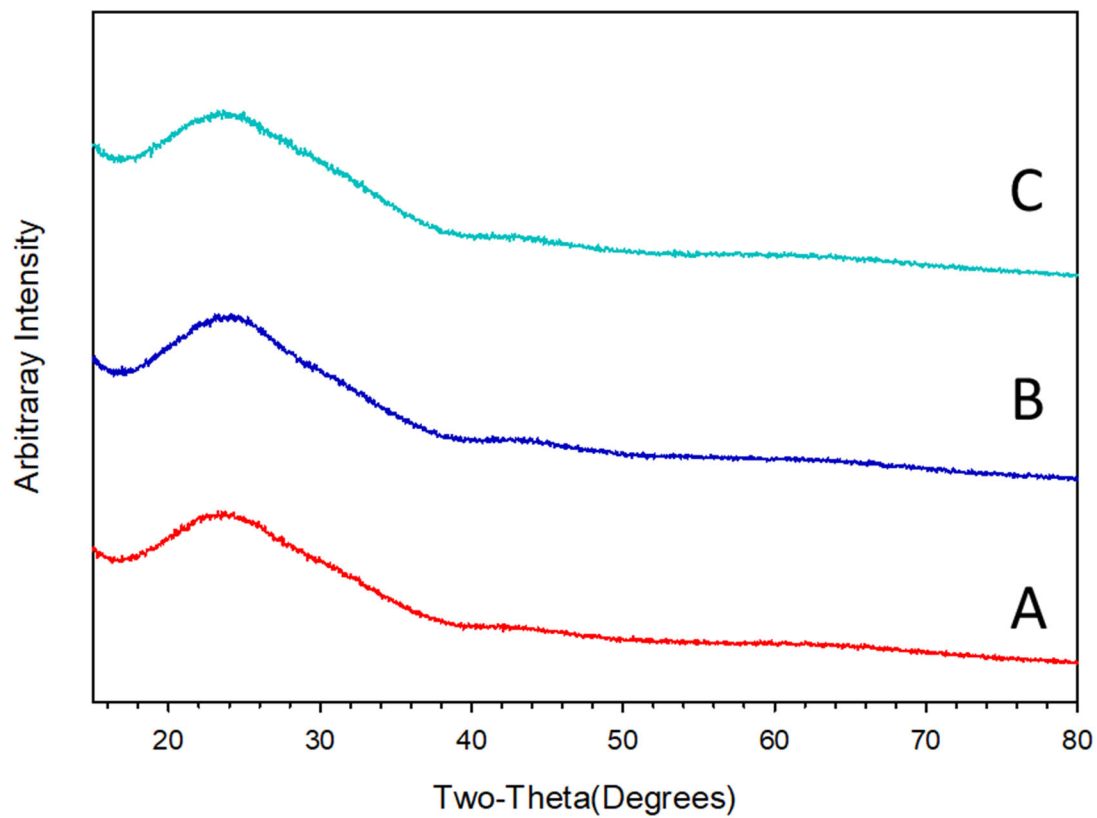

**Figure S4.** XRD results of (A) pristine carbon black (XC-72), annealed carbon black at 500 °C for 48 hours (B) without and (C) with excess phosphorus.

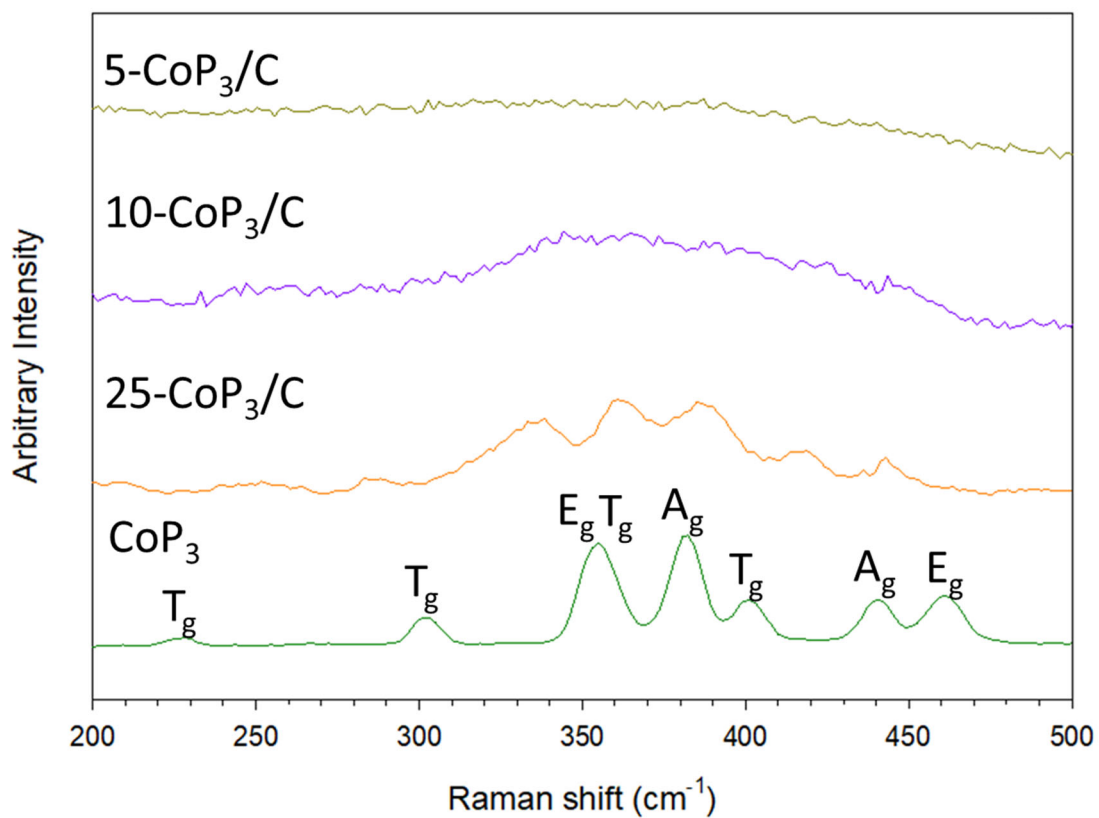

**Figure S5.** An overlay of Raman spectra of CoP<sub>3</sub>, x-CoP<sub>3</sub>/C (x = 5, 10, 25) in the zoomed in region of 200-500 cm<sup>-1</sup>.

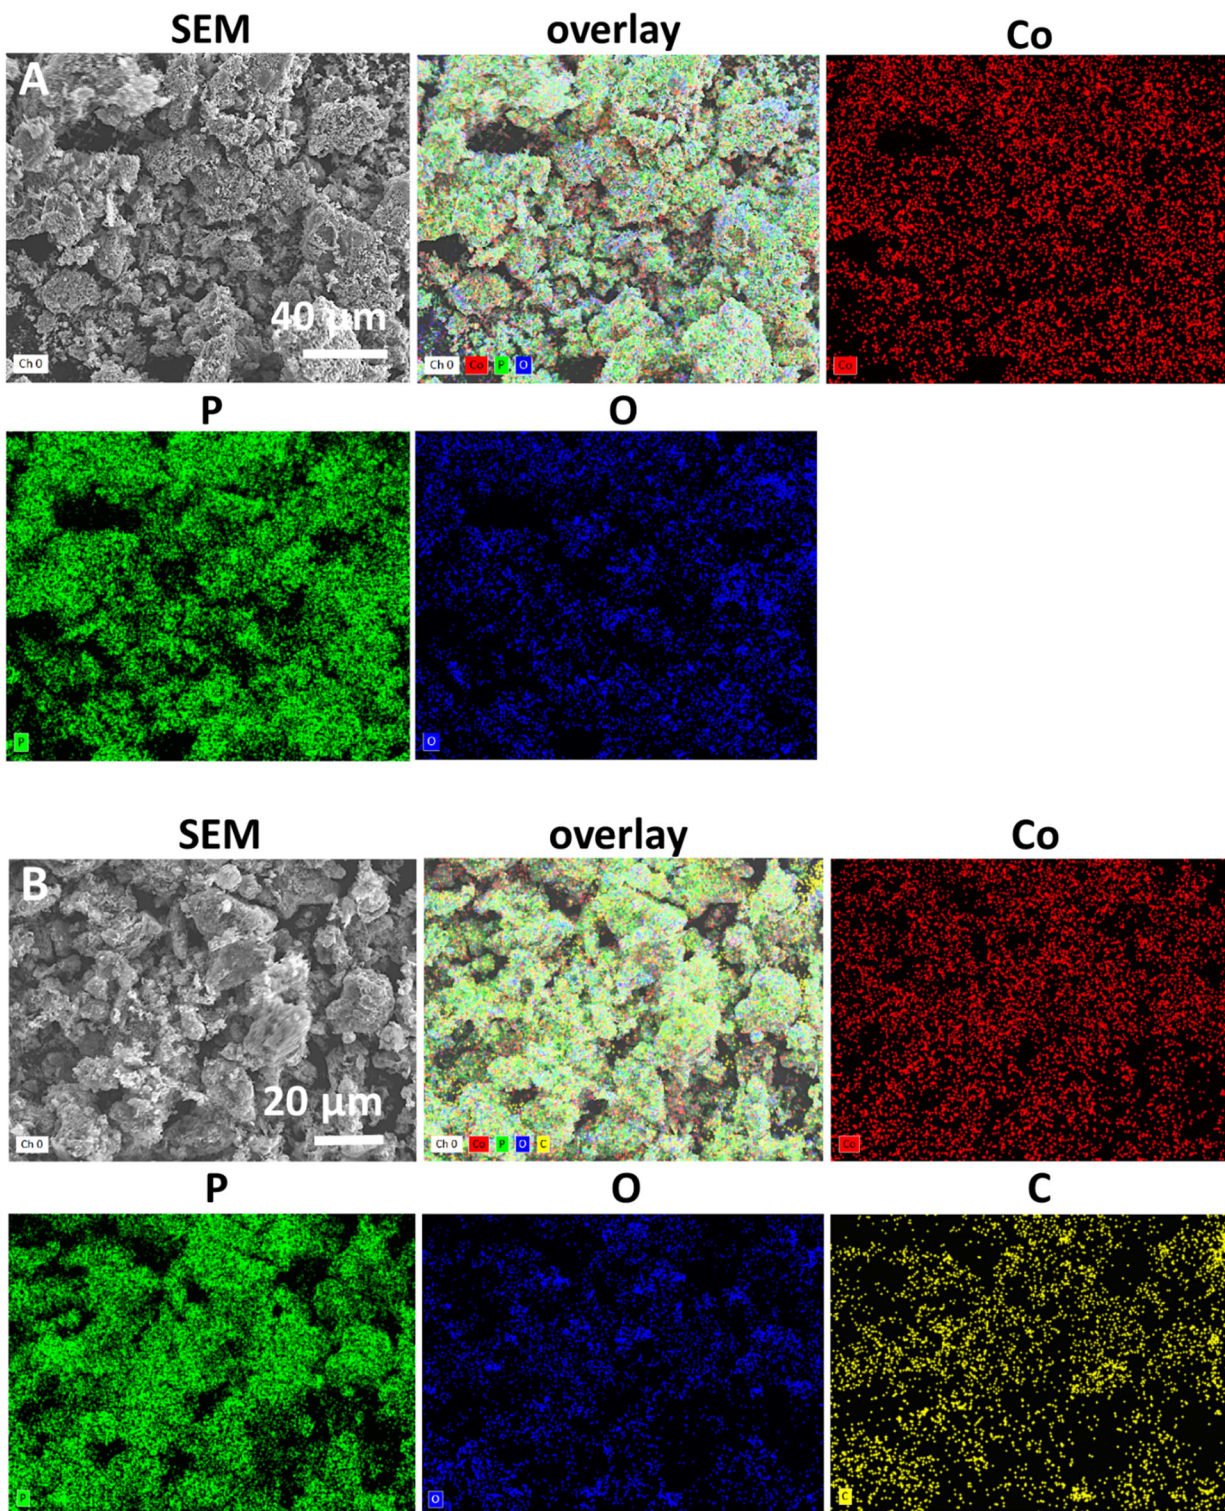

**Figure S6.** EDS elemental maps of (A)  $\text{CoP}_3$  and (B)  $25\text{-CoP}_3/\text{C}$ .



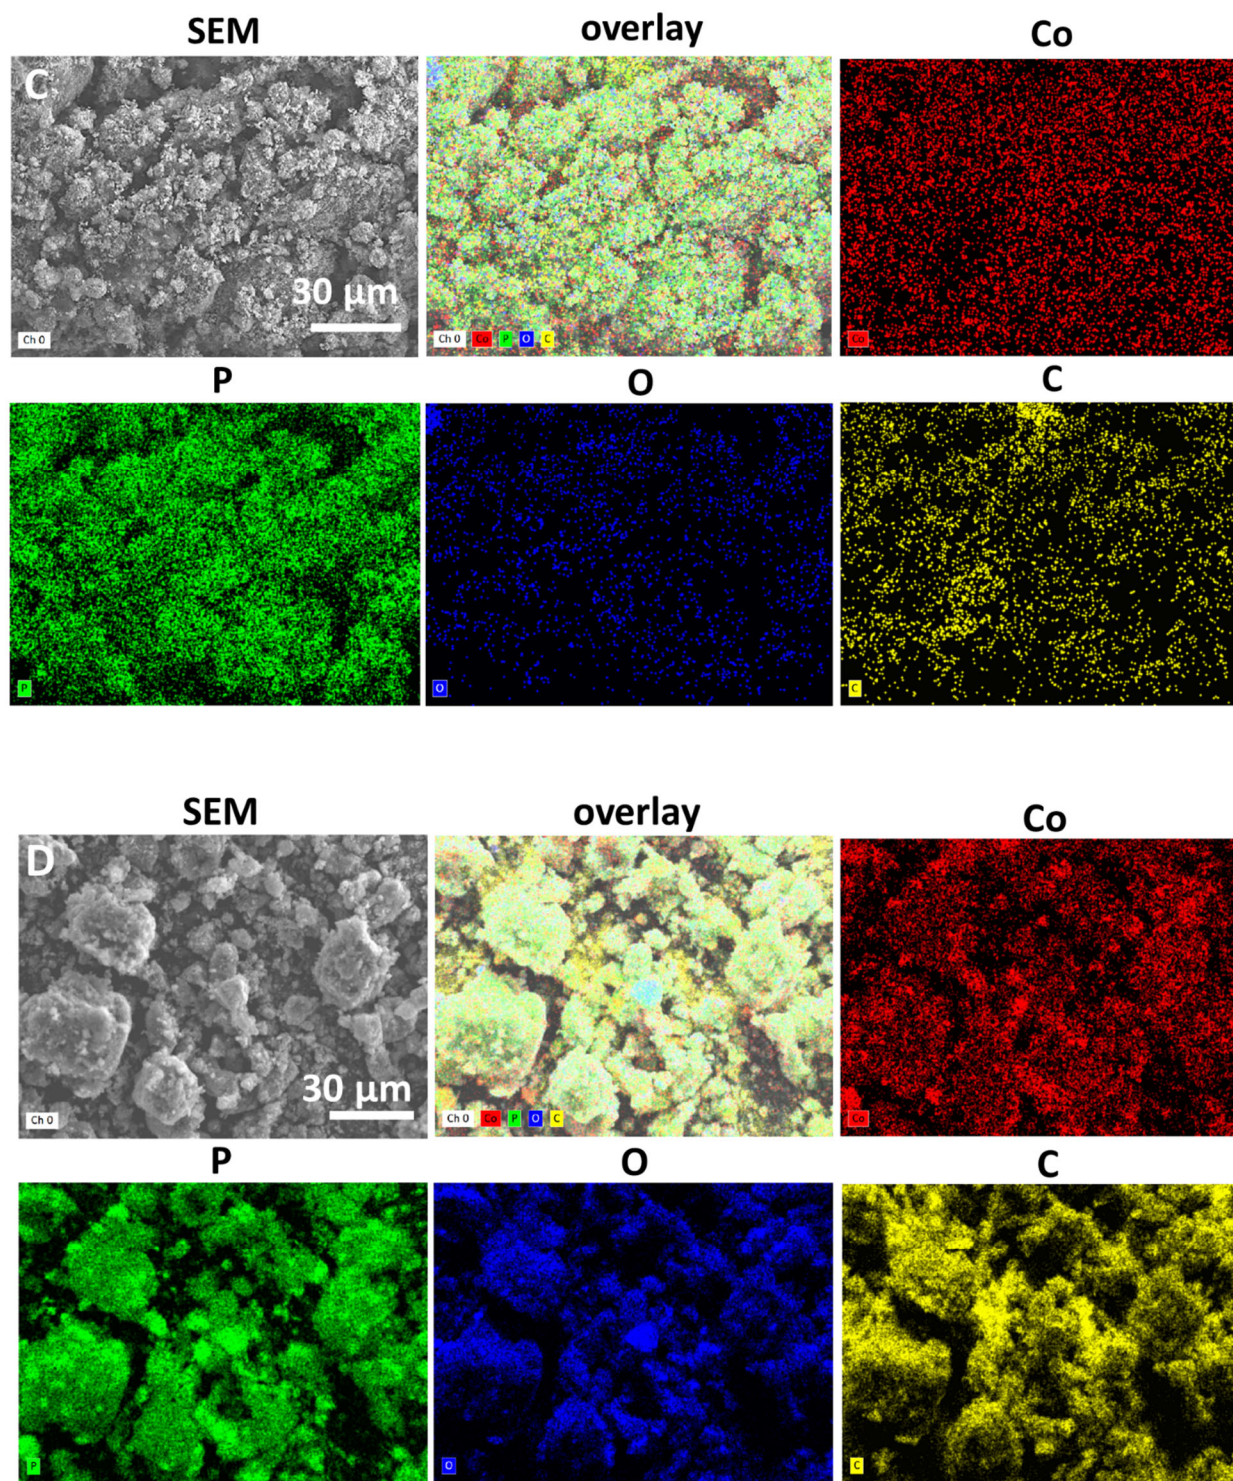

**Figure S7.** EDS elemental maps of (C) 10-CoP<sub>3</sub>/C and (D) 5-CoP<sub>3</sub>/C.



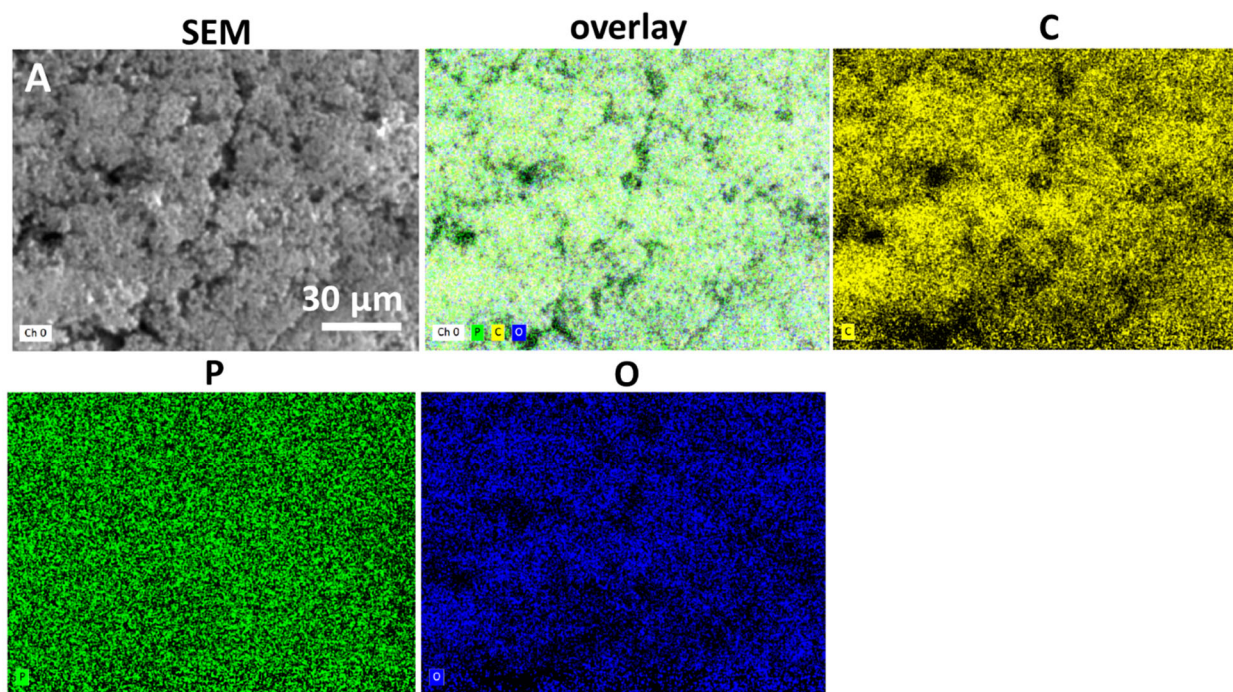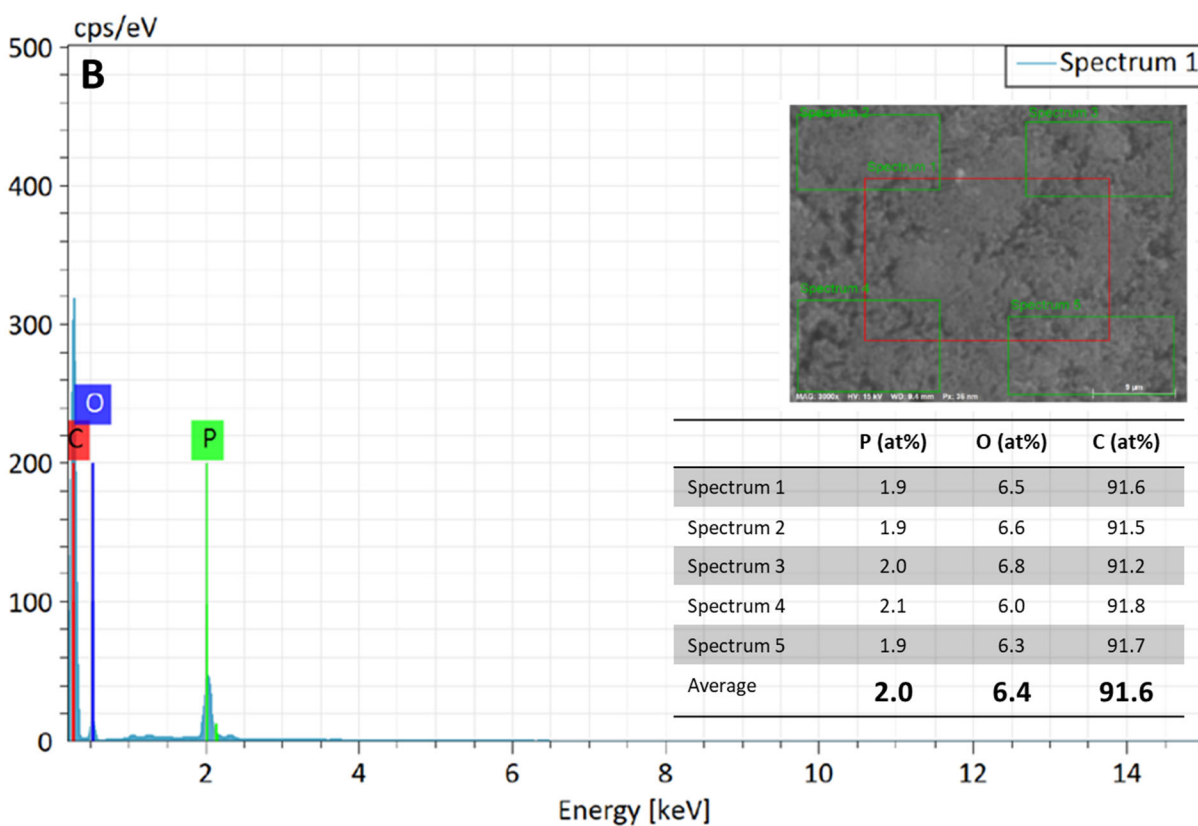

**Figure S8.** (A) EDS elemental maps and (B) analysis of annealed carbon black with phosphorous.

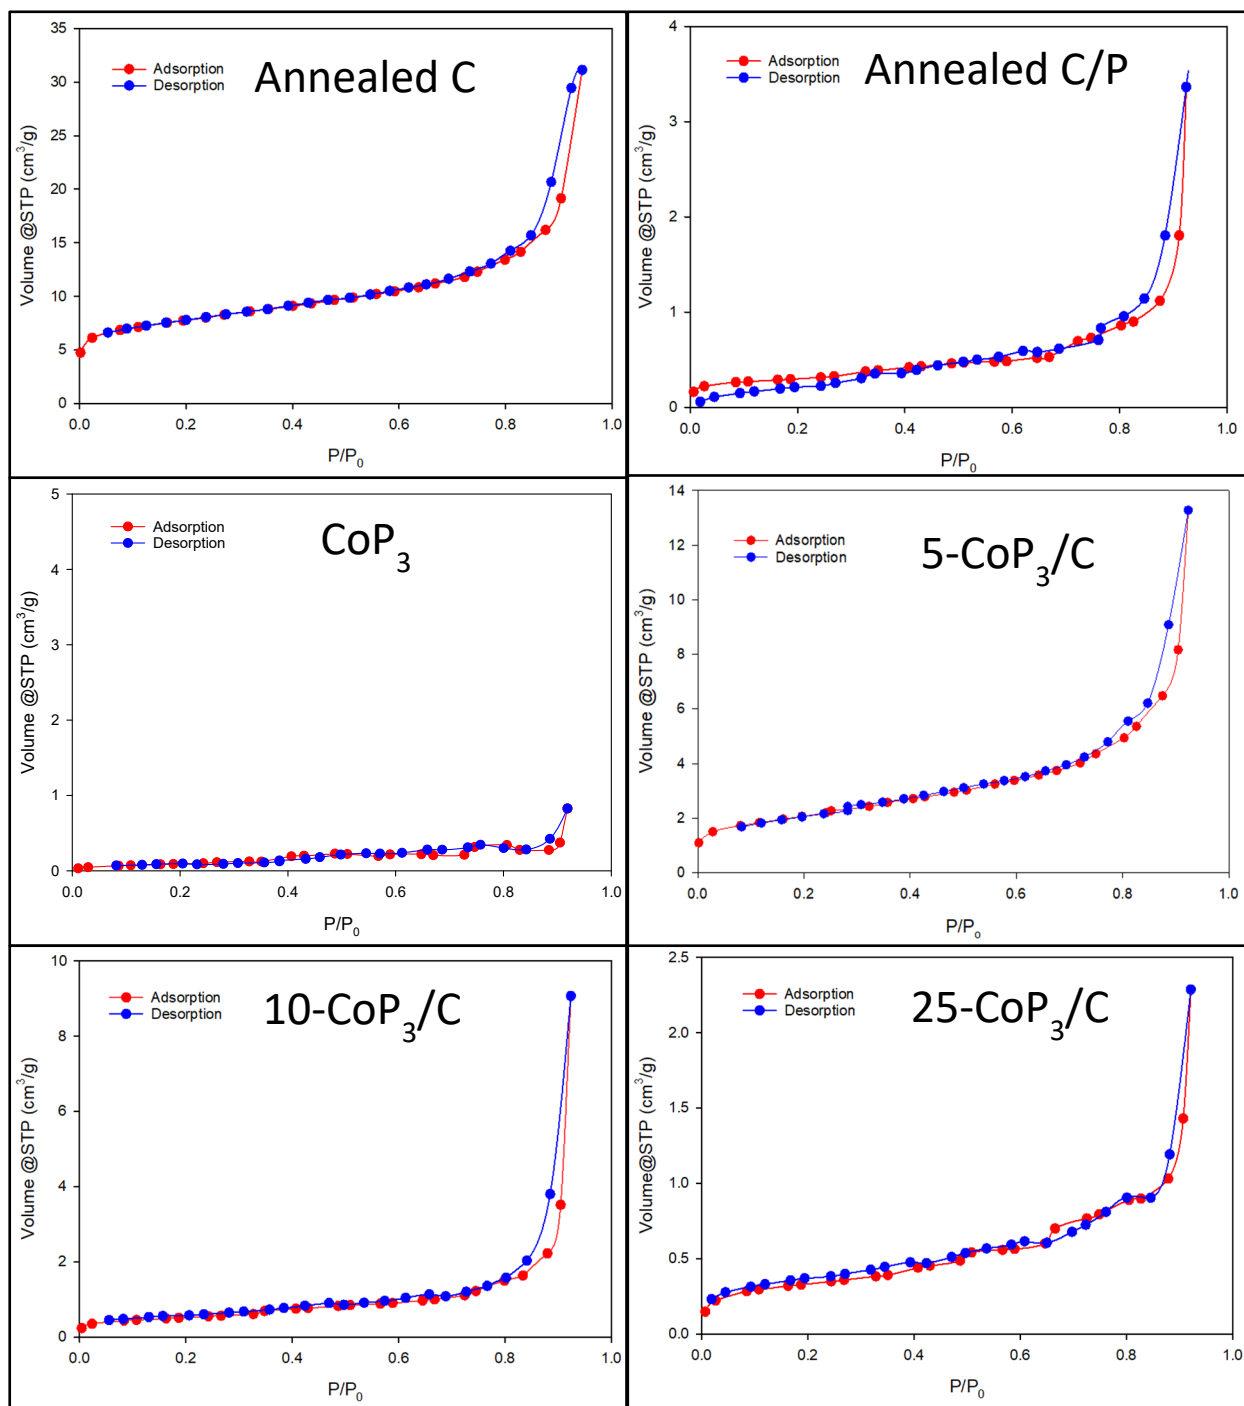

**Figure S9.** 50-point BET full isotherms of annealed carbon black with or without phosphorus,  $\text{CoP}_3$  and  $x\text{-CoP}_3/\text{C}$  ( $x = 5, 10, 25$ ) materials.

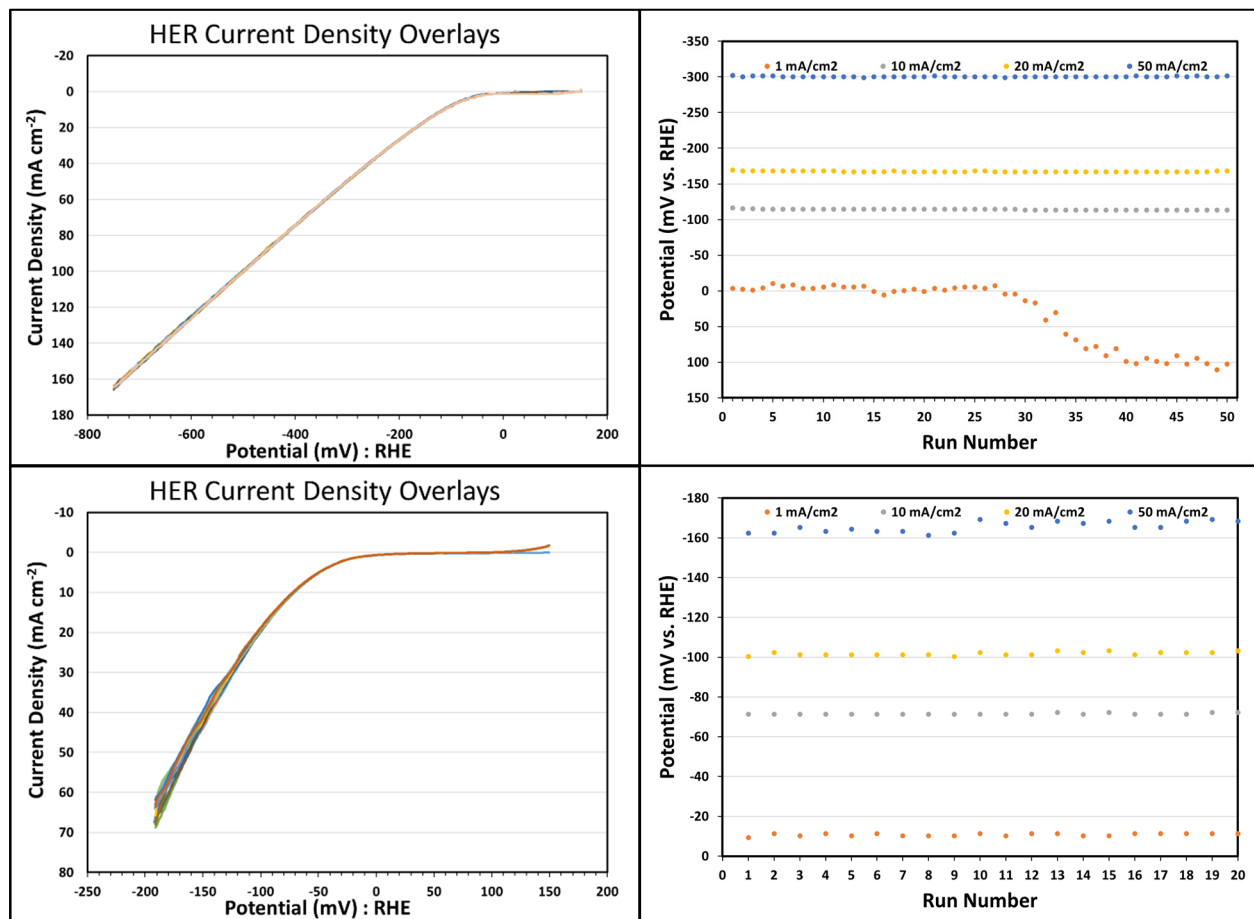

**Figure S10.** Left column: Overlay plots of  $iR$  uncompensated (50 LSV runs, top) and 85%  $iR$  compensated (20 LSV runs, bottom) of  $\text{CoP}_3$  for HER experiments in 0.5 M  $\text{H}_2\text{SO}_4$  at 5 mV/s scan rate. Right column: Plots of run number versus applied potentials to produce 1, 10, 20, 50 mA/cm<sup>2</sup> current densities using the LSV overlap plots shown in the left column.



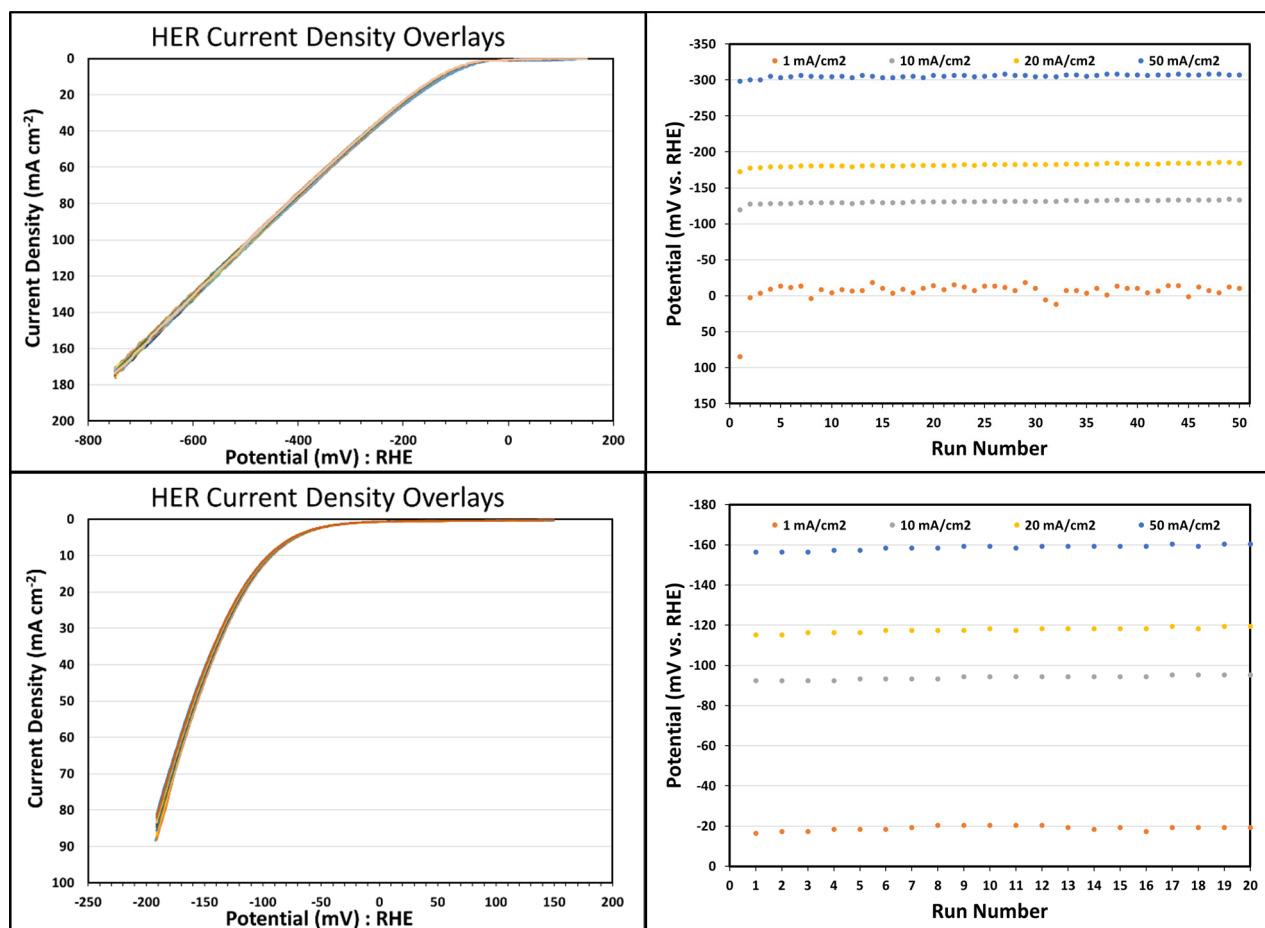

**Figure S11.** Left column: Overlay plots of *i*R uncompensated (50 LSV runs, top) and 85% *i*R compensated (20 LSV runs, bottom) of 25-CoP<sub>3</sub>/C for HER experiments in 0.5 M H<sub>2</sub>SO<sub>4</sub> at 5 mV/s scan rate. Right column: Plots of run number versus applied potentials to produce 1, 10, 20, 50 mA/cm<sup>2</sup> current densities using the LSV overlap plots shown in the left column.

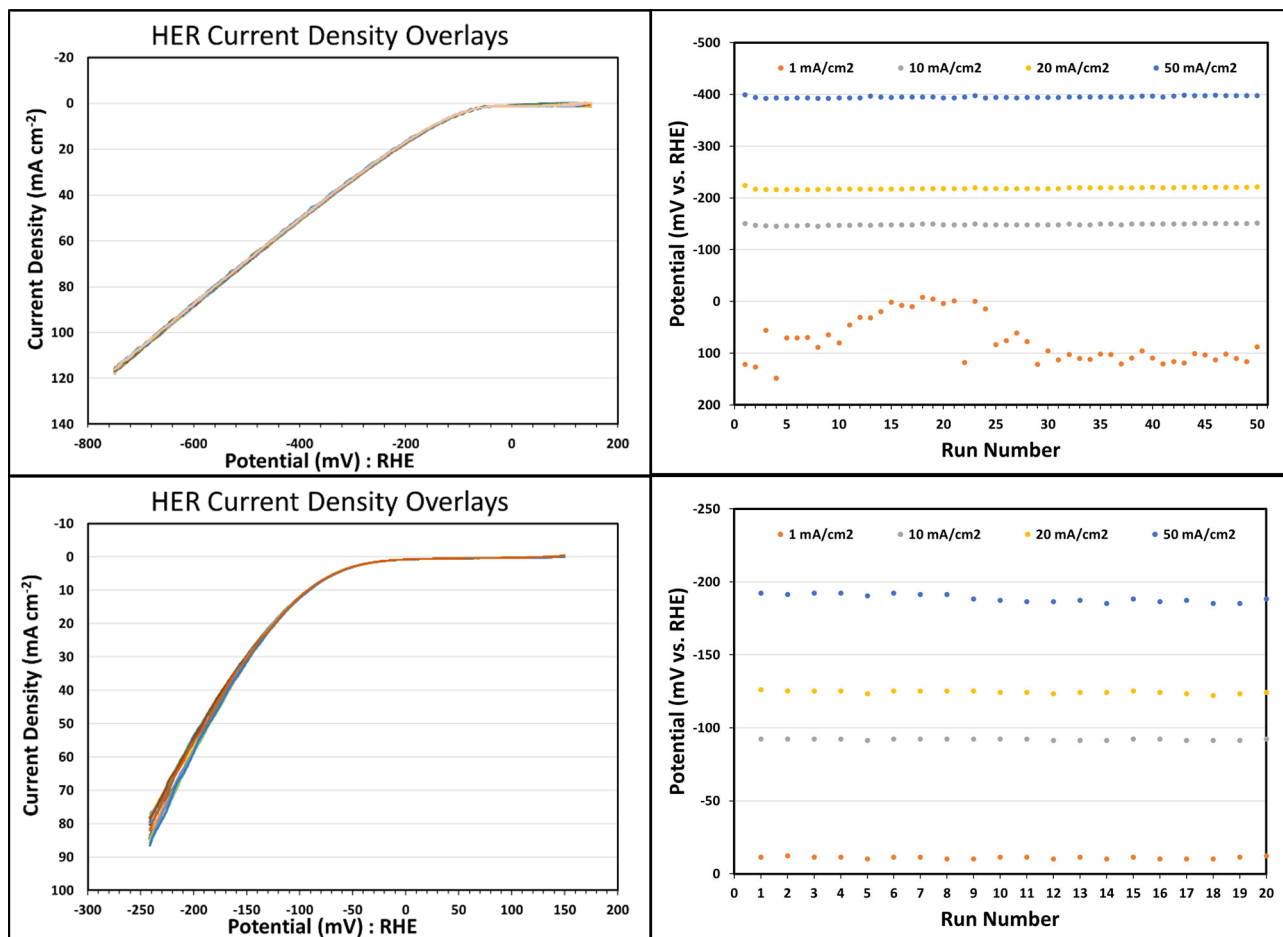

**Figure S12.** Left column: Overlay plots of *i*R uncompensated (50 LSV runs, top) and 85% *i*R compensated (20 LSV runs, bottom) of 10-CoP<sub>3</sub>/C for HER experiments in 0.5 M H<sub>2</sub>SO<sub>4</sub> at 5 mV/s scan rate. Right column: Plots of run number versus applied potentials to produce 1, 10, 20, 50 mA/cm<sup>2</sup> current densities using the LSV overlap plots shown in the left column.

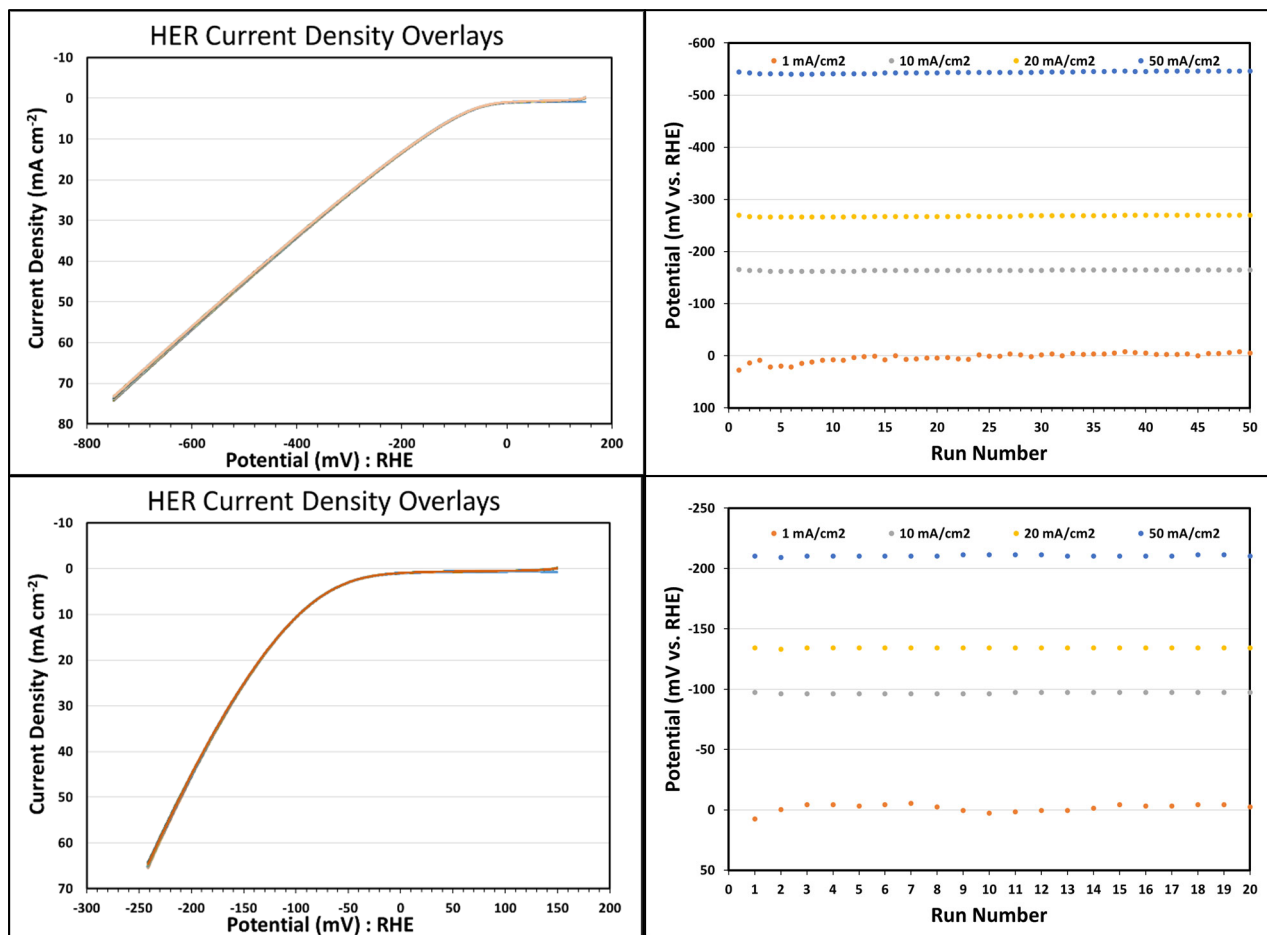

**Figure S13.** Left column: Overlay plots of  $iR$  uncompensated (50 LSV runs, top) and 85%  $iR$  compensated (20 LSV runs, bottom) of 5-CoP<sub>3</sub>/C for HER experiments in 0.5 M H<sub>2</sub>SO<sub>4</sub> at 5 mV/s scan rate. Right column: Plots of run number versus applied potentials to produce 1, 10, 20, 50 mA/cm<sup>2</sup> current densities using the LSV overlap plots shown in the left column.

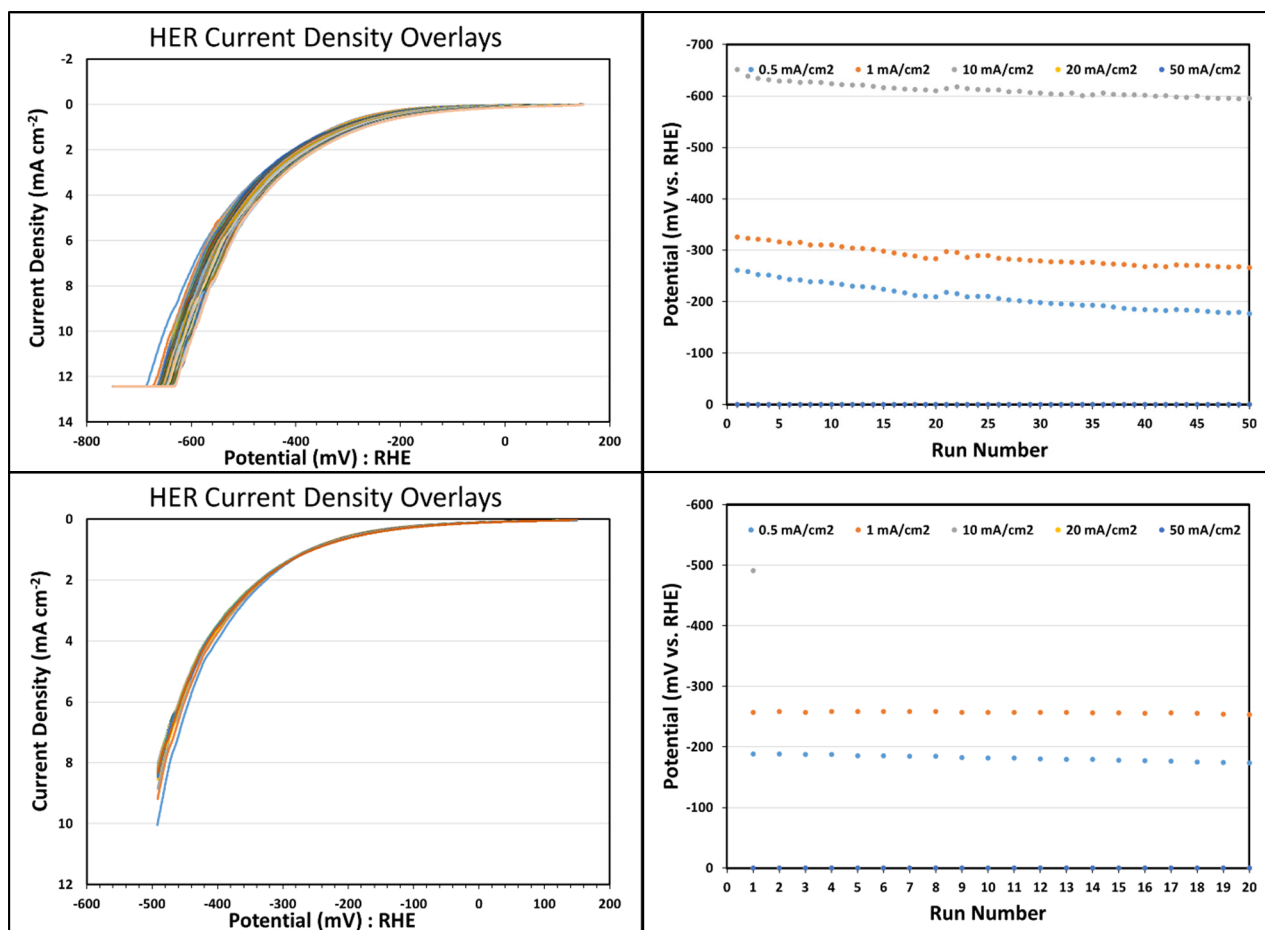

**Figure S14.** Left column: Overlay plots of iR uncompensated (50 LSV runs, top) and 85% iR compensated (20 LSV runs, bottom) of carbon black annealed with phosphorus for HER experiments in 0.5 M H<sub>2</sub>SO<sub>4</sub> at 5 mV/s scan rate. Right column: Plots of run number versus applied potentials to produce 1, 10, 20, 50 mA/cm<sup>2</sup> current densities using the LSV overlap plots shown in the left column.

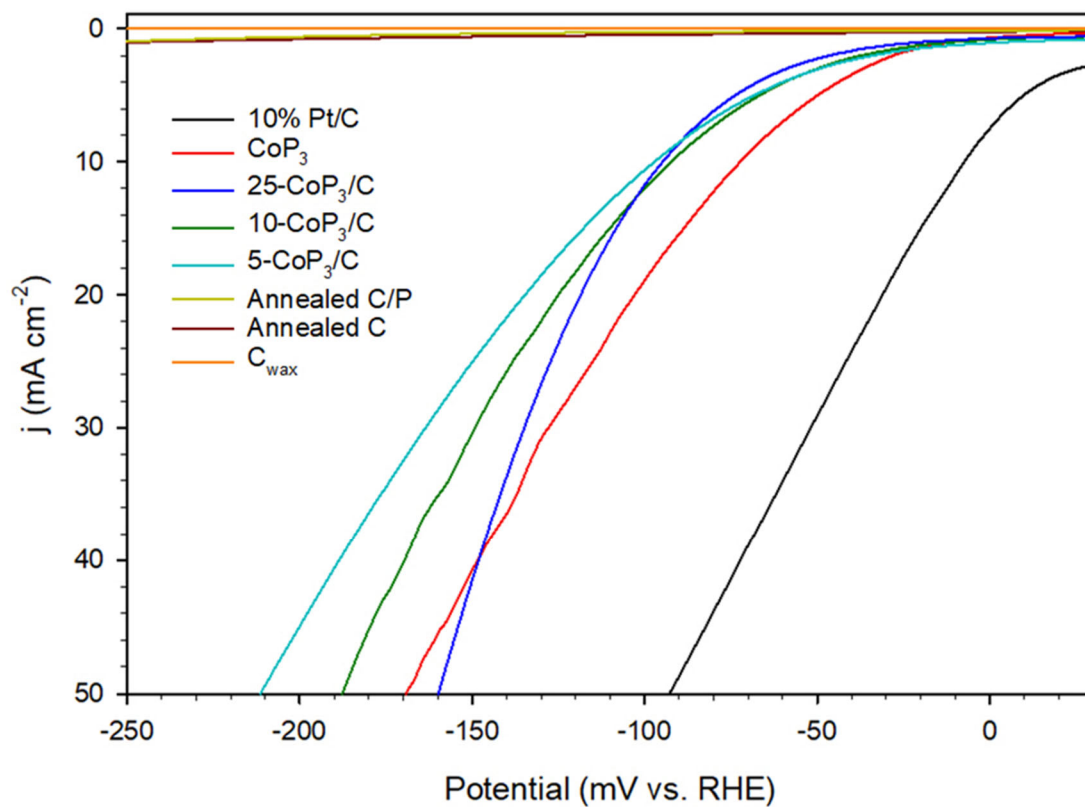

**Figure S15.** Representative 85%  $iR$  compensated LSV overlay plot of HER results for CoP<sub>3</sub>, x-CoP<sub>3</sub>/C (x = 5, 10, 25) and carbon black annealed with phosphorus.

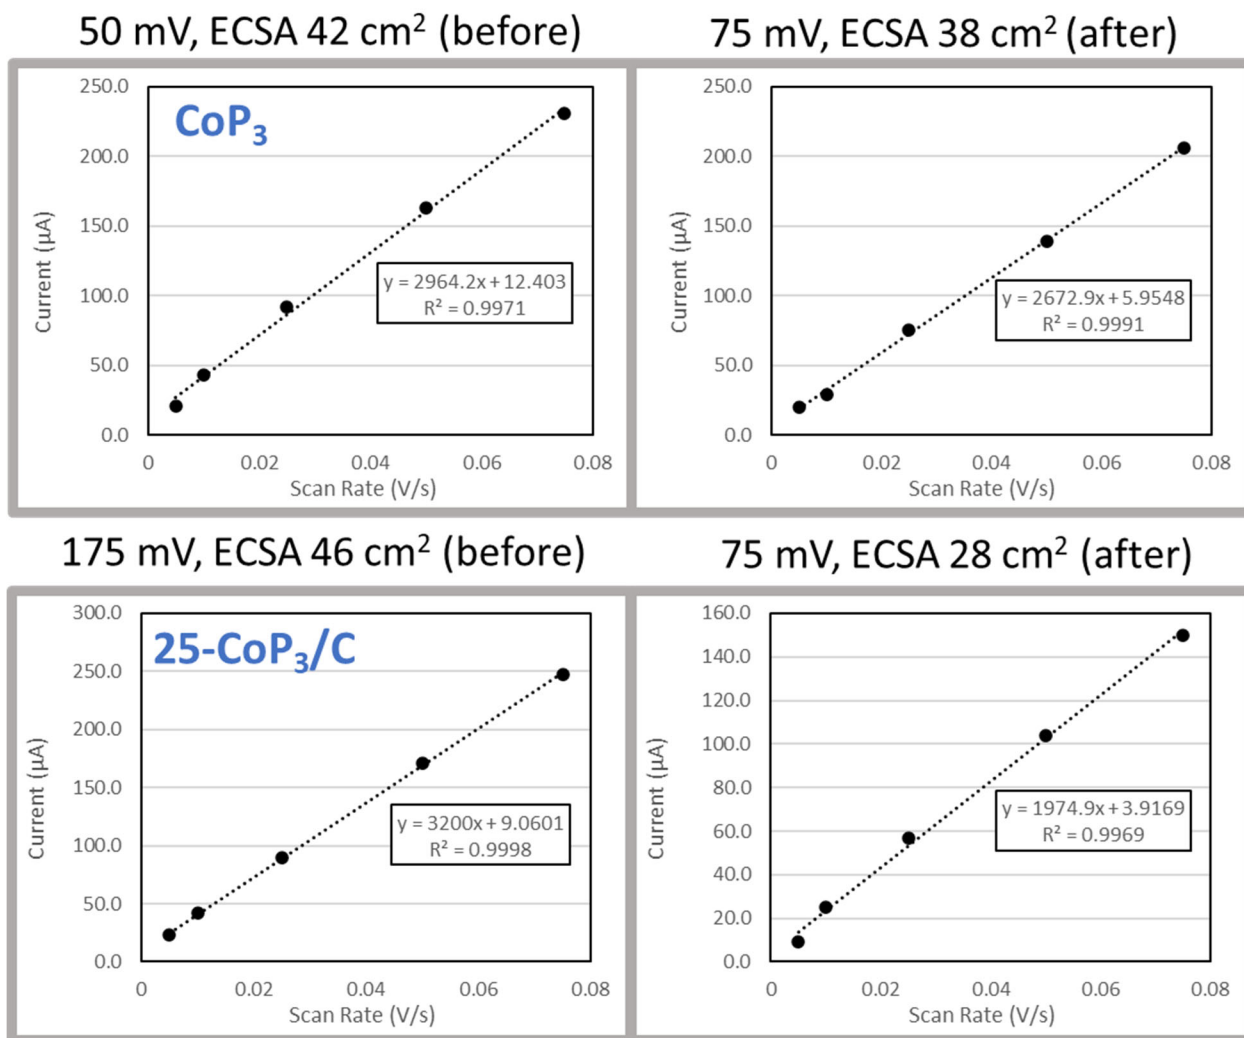

**Figure S16.** Analysis of scan rate data from CV runs to calculate ECSA values before and after 50 LSV scans (*iR* uncompensated) for CoP<sub>3</sub> and 25-CoP<sub>3</sub>/C materials from Table 2.

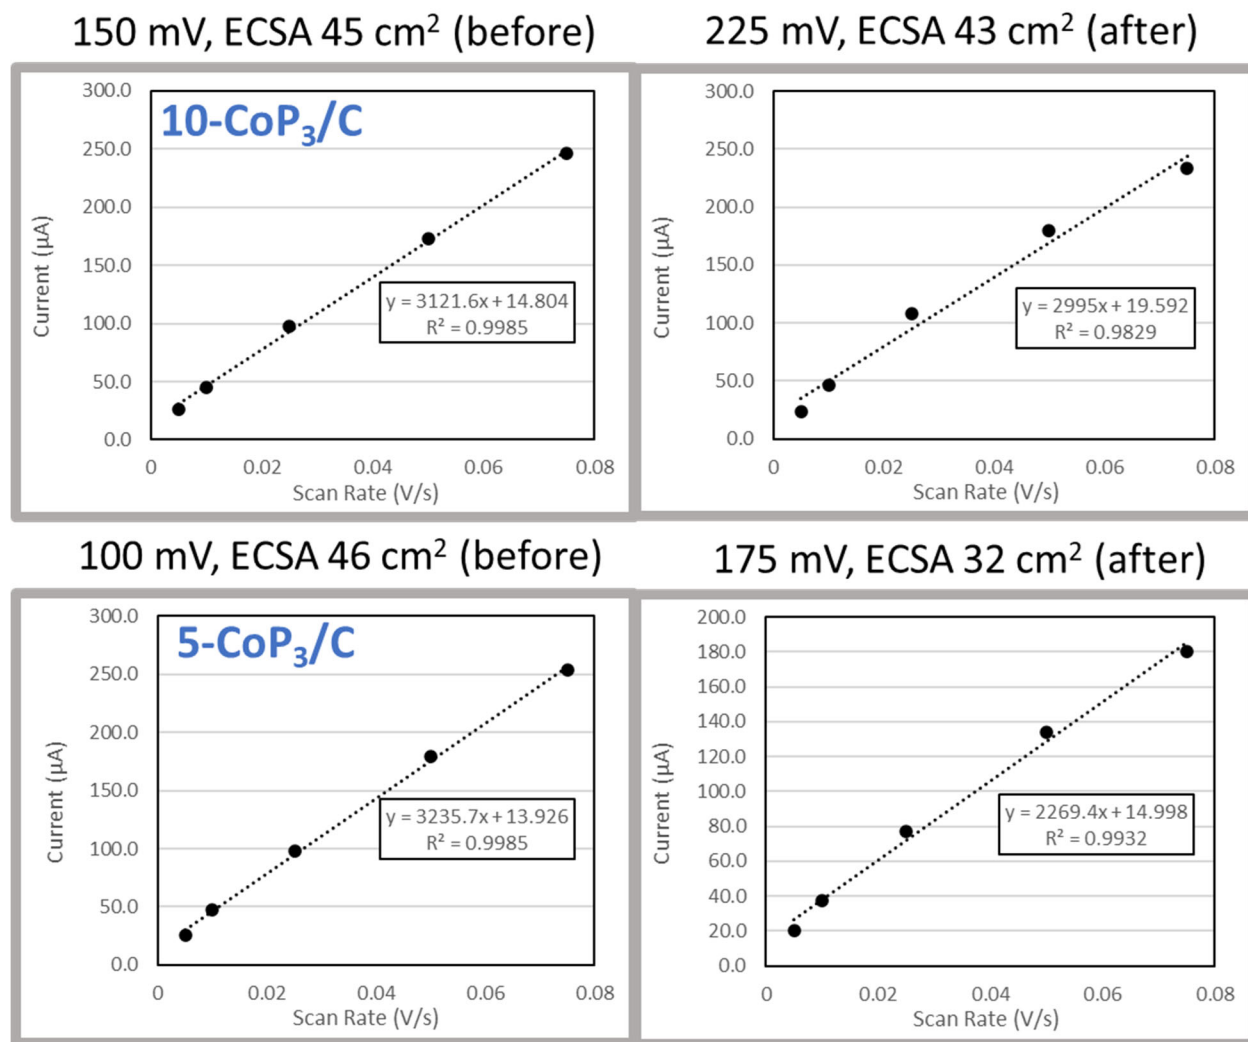

**Figure S17.** Analysis of scan rate data from CV runs to calculate ECSA values before and after 50 LSV scans (*iR* uncompensated) for 10-CoP<sub>3</sub>/C and 5-CoP<sub>3</sub>/C materials from Table 2.

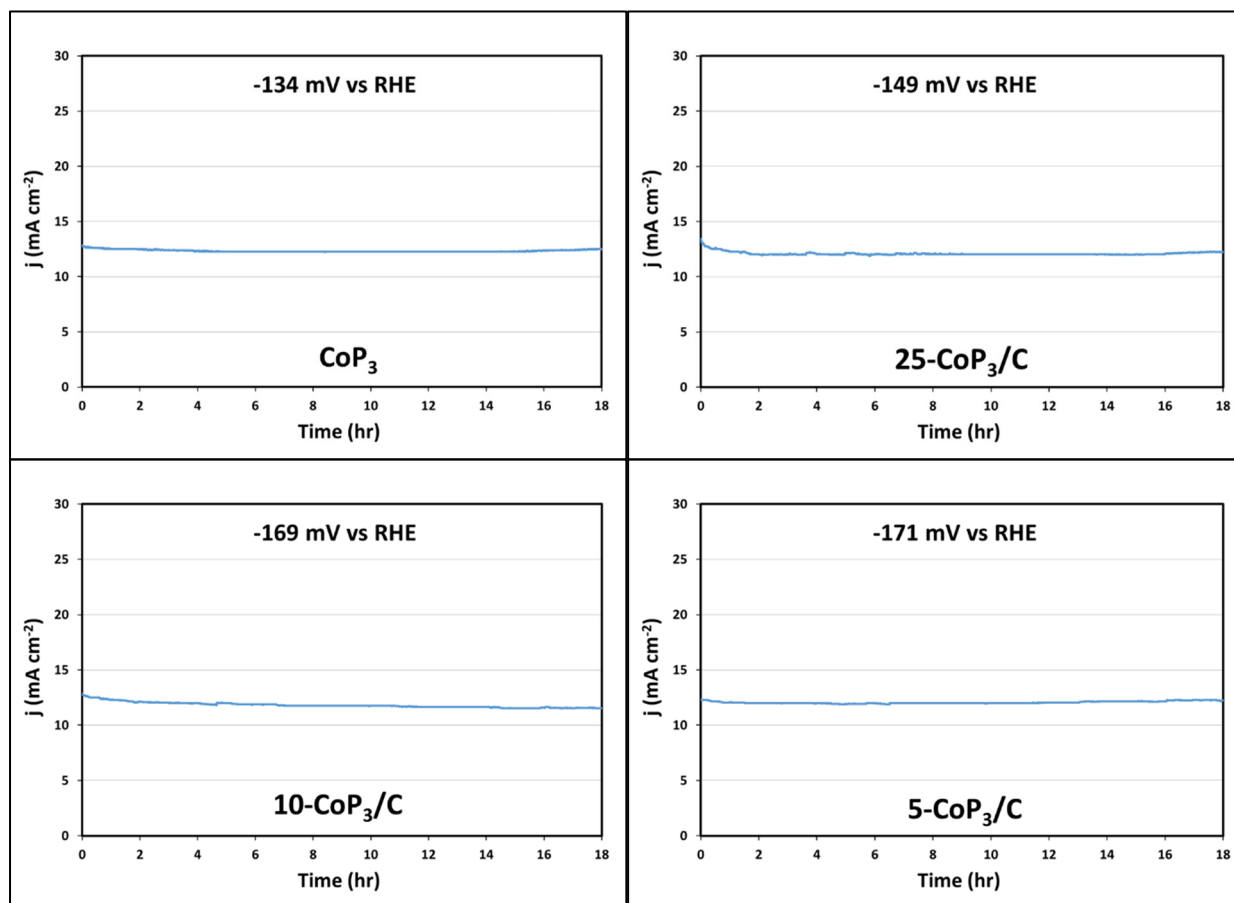

**Figure S18.** 18-hour constant potential chronoamperometry (CA) HER experiments for CoP<sub>3</sub> and x-CoP<sub>3</sub>/C (x = 5, 10, 25) catalysts using a platinum counter electrode.



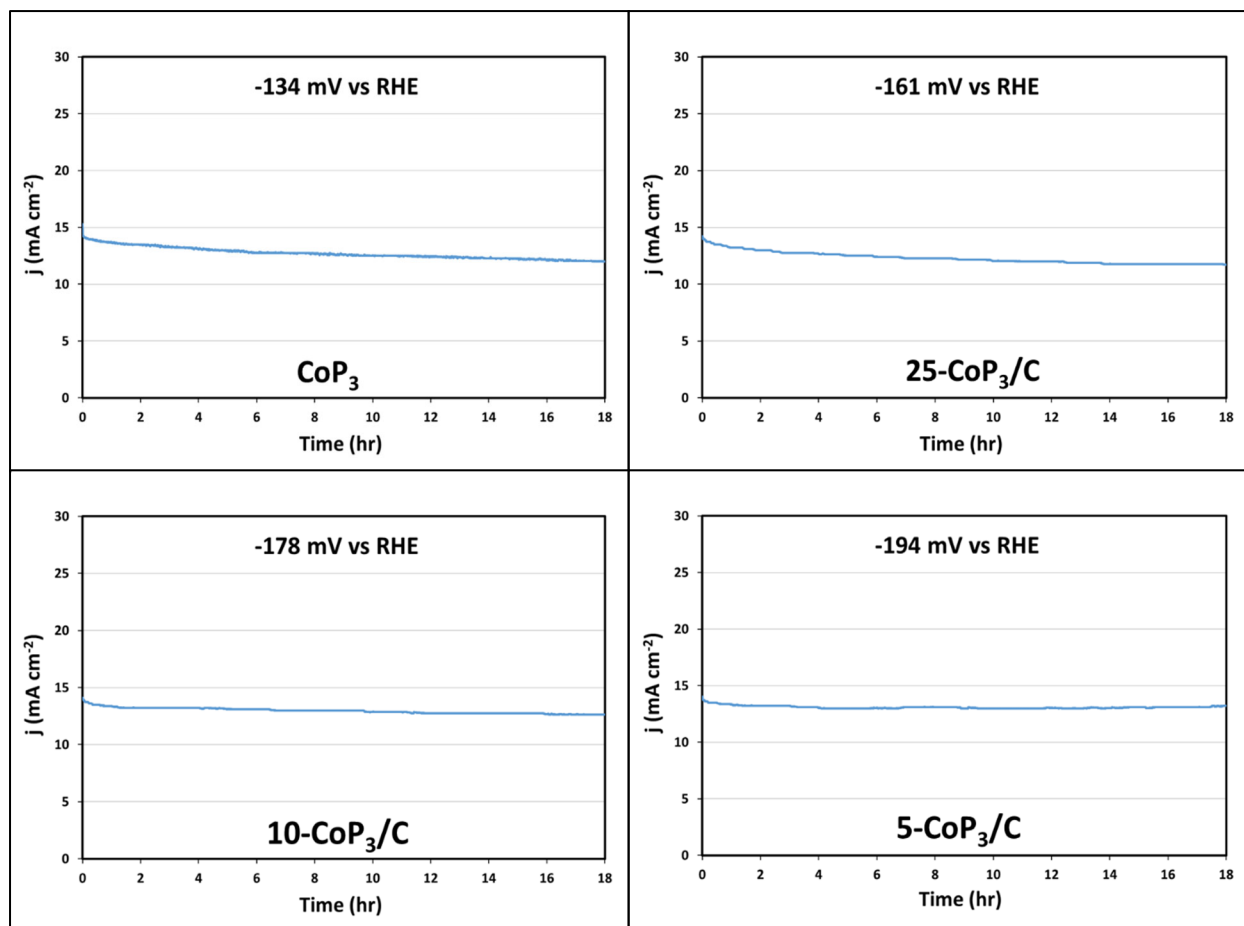

**Figure S19.** 18-hour constant potential chronoamperometry (CA) HER experiments for CoP<sub>3</sub> and x-CoP<sub>3</sub>/C (x = 5, 10, 25) catalysts using graphite rod counter electrode.

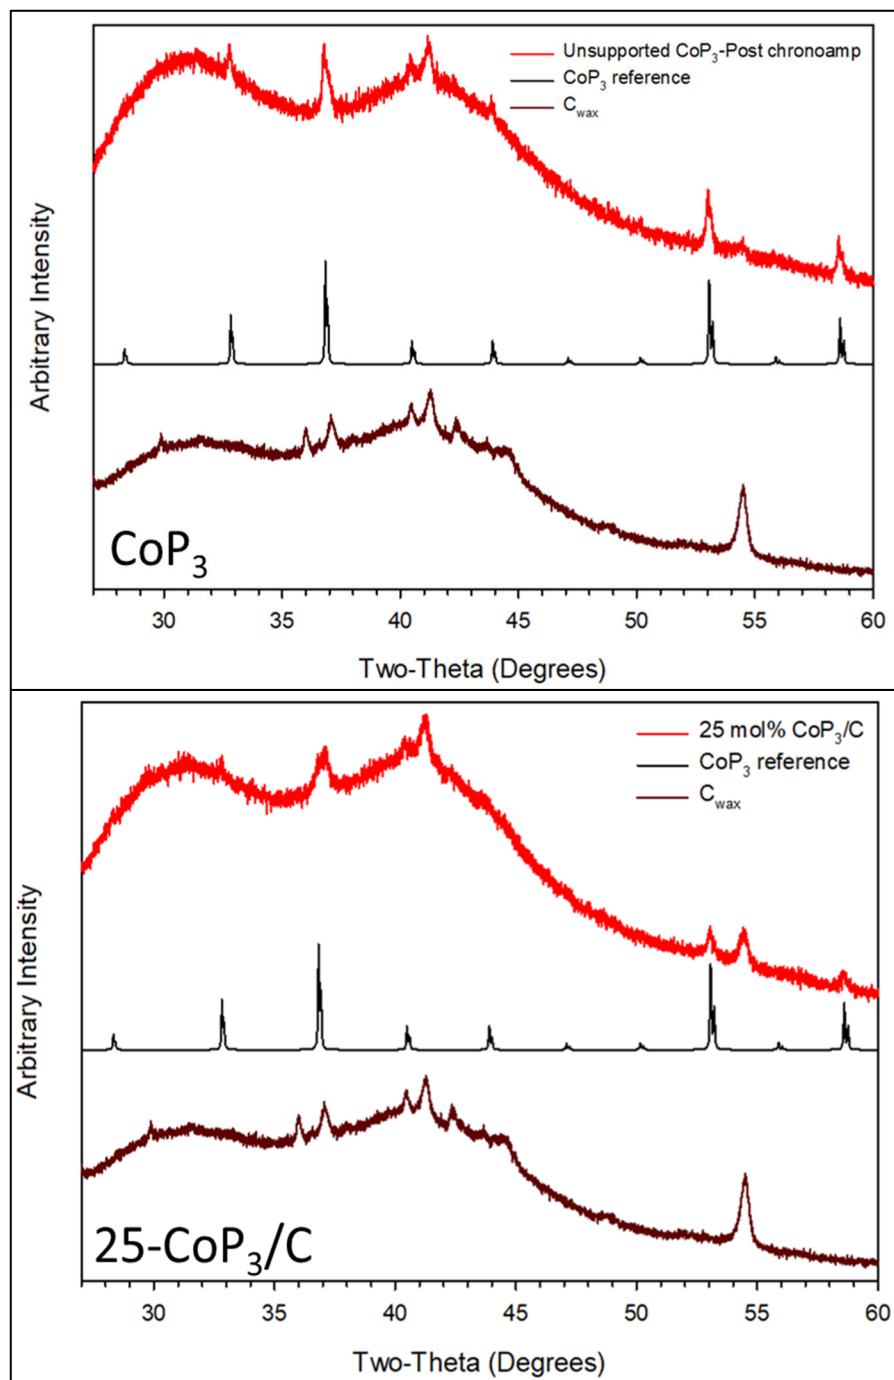

**Figure S20.** XRD results of  $\text{CoP}_3$  and  $25\text{-CoP}_3/\text{C}$  materials embedded on  $\text{C}_{\text{wax}}$  tips before and after 18-hour constant potential chronoamperometry (CA) HER experiments.

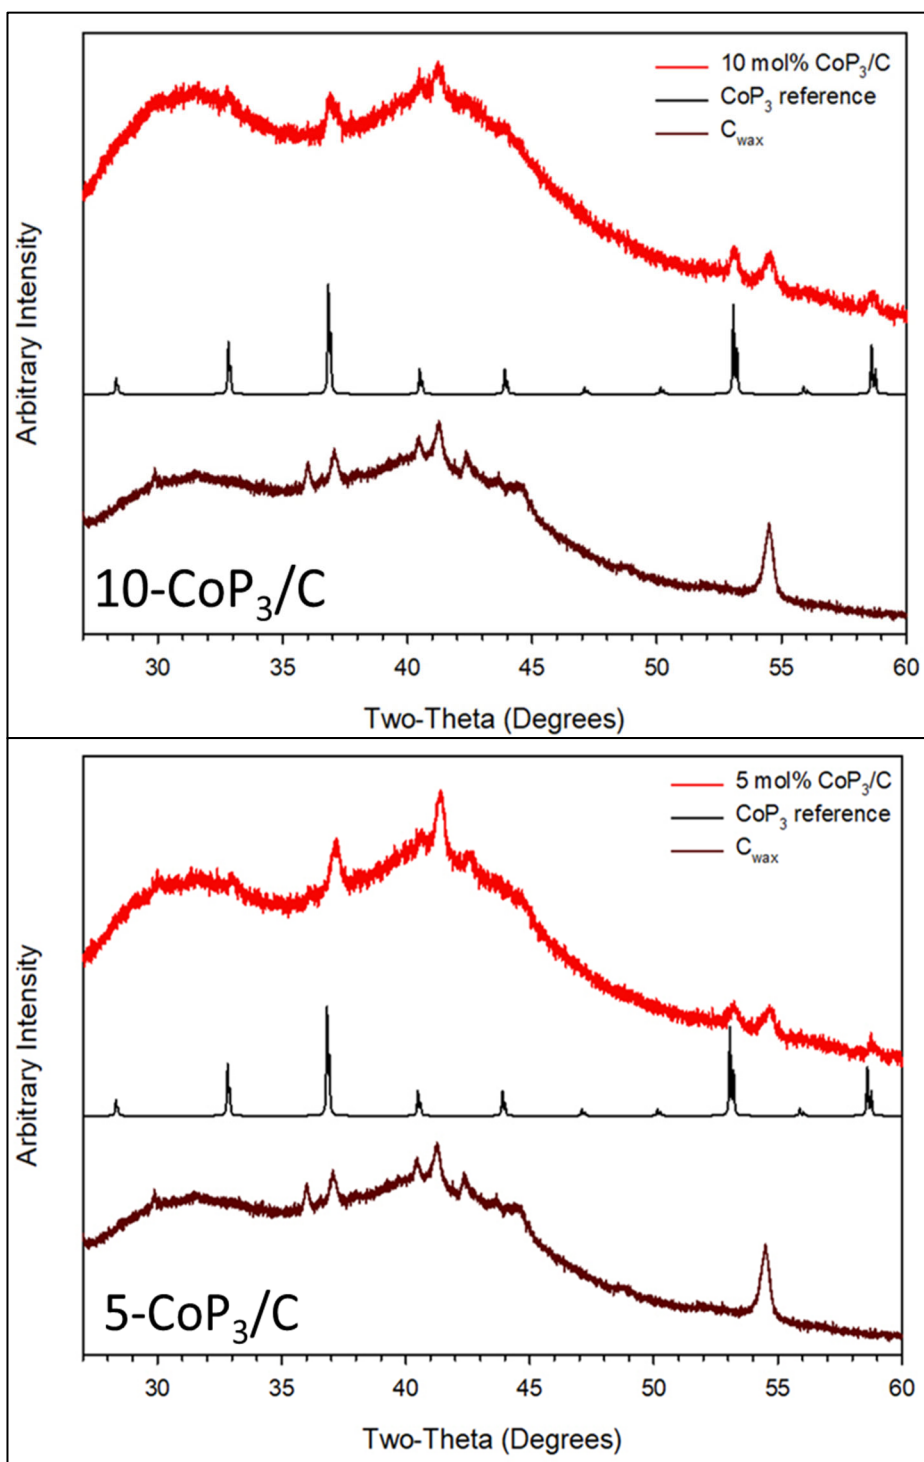

**Figure S21.** XRD results of 10-CoP<sub>3</sub>/C and 5-CoP<sub>3</sub>/C materials embedded on C<sub>wax</sub> tips before and after 18-hour constant potential chronoamperometry (CA) HER experiments.

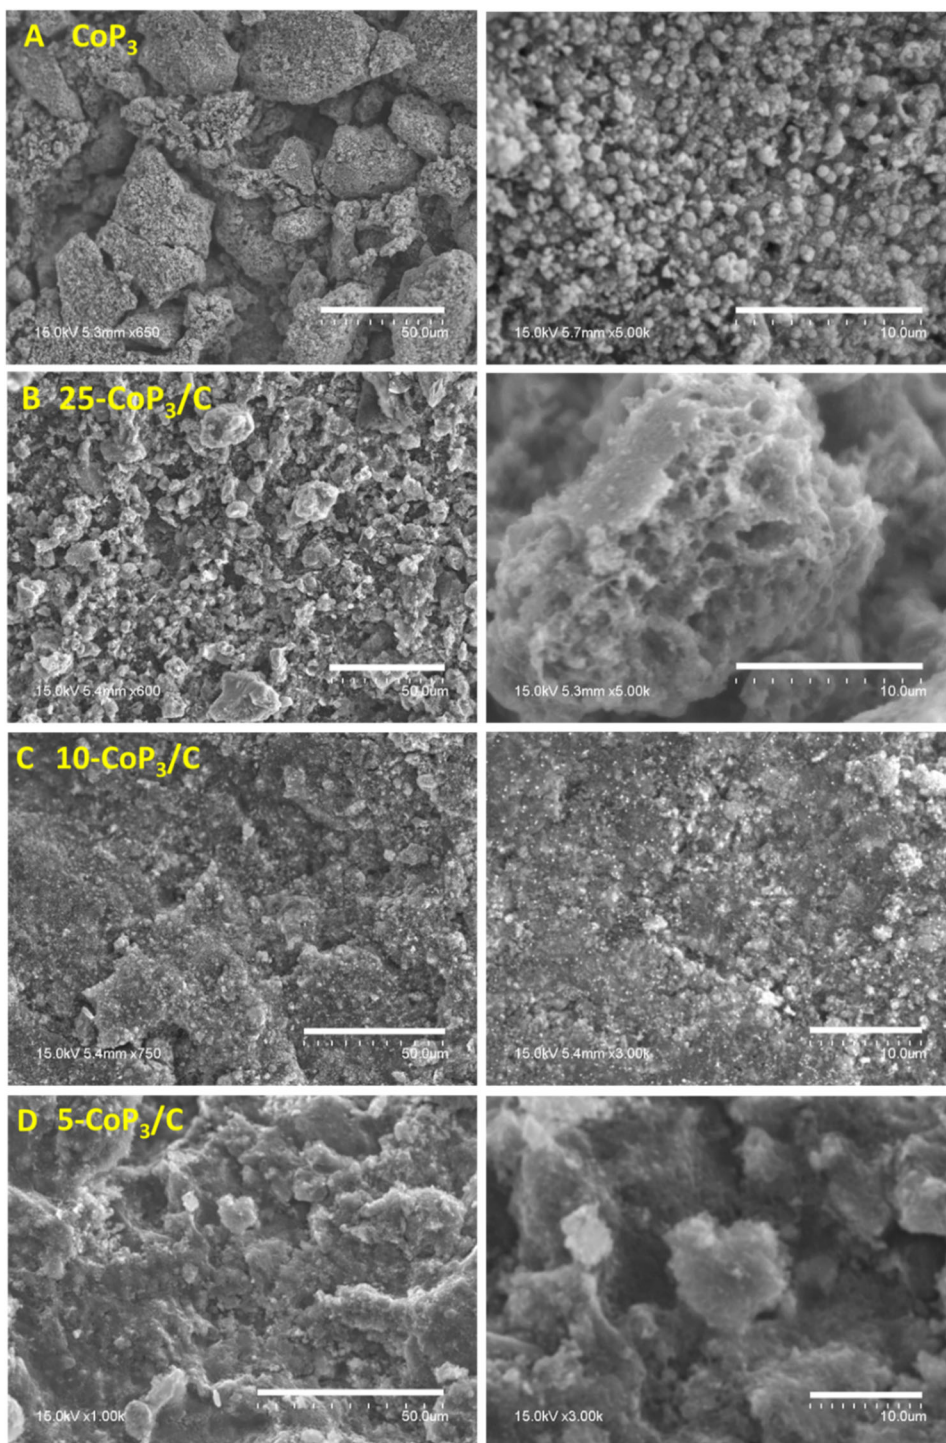

**Figure S22.** Scanning electron microscopy (SEM) images of (A)  $\text{CoP}_3$ , (B) 25- $\text{CoP}_3/\text{C}$ , (C) 10- $\text{CoP}_3/\text{C}$ , and (D) 5- $\text{CoP}_3/\text{C}$  embedded on a  $\text{C}_{\text{wax}}$  electrode tip after 18-hour CA HER experiments.



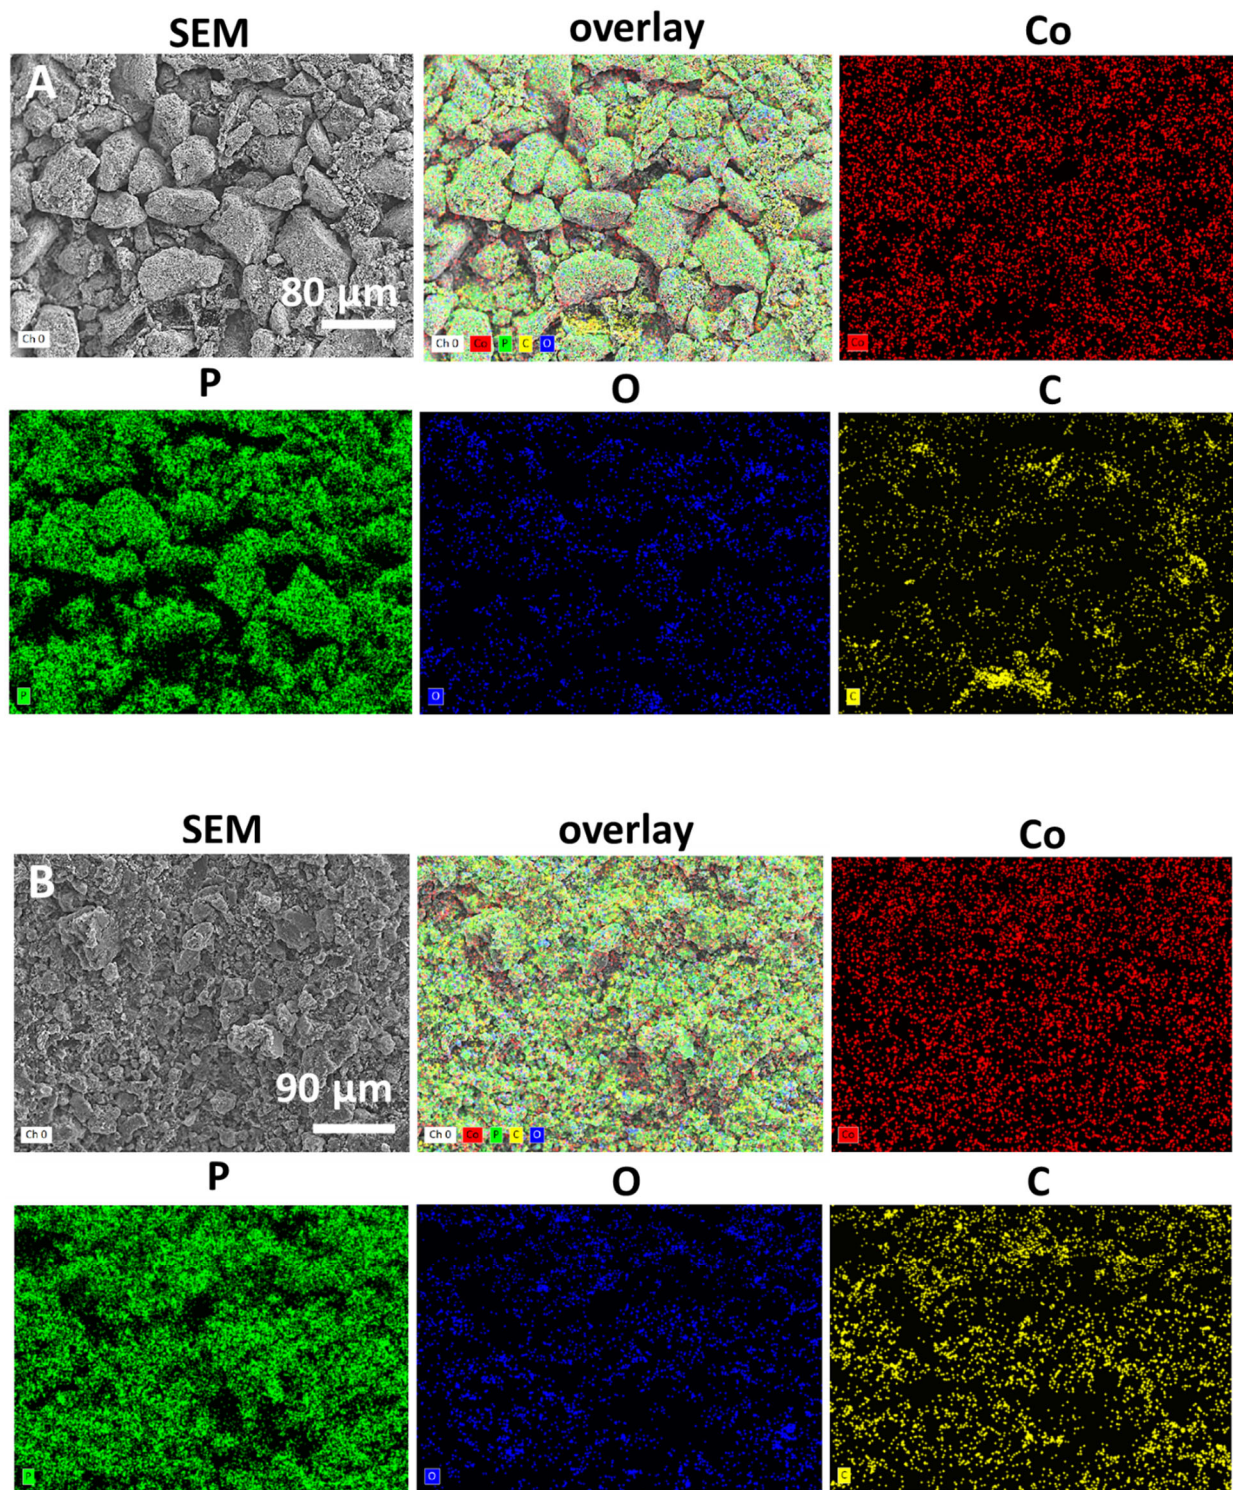

**Figure S23.** EDS maps of (A) CoP<sub>3</sub> and (B) 25-CoP<sub>3</sub>/C embedded on C<sub>wax</sub> electrode tips after 18-hour CA HER experiments.



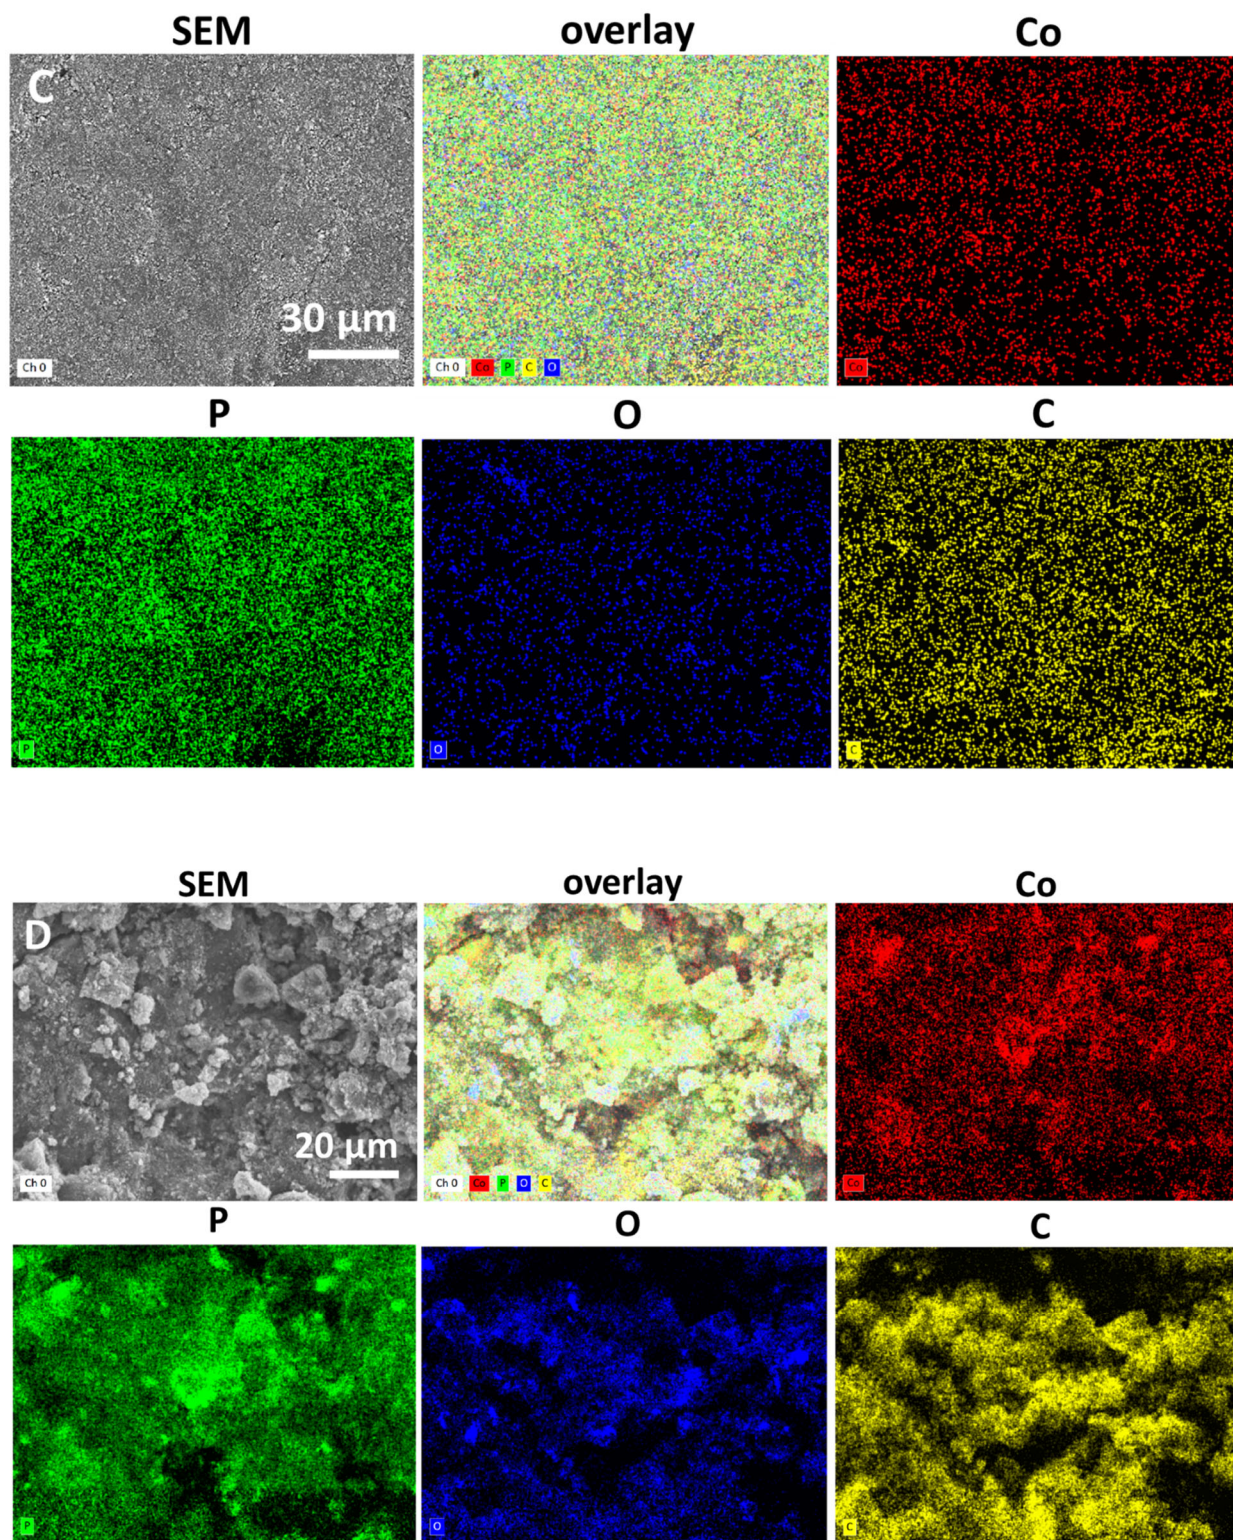

**Figure S24.** EDS maps of (C) 10-CoP<sub>3</sub>/C and (D) 5-CoP<sub>3</sub>/C embedded on C<sub>wax</sub> electrode tips after 18-hour CA HER experiments.

**Table S1.** EDS compositional analysis of  $\text{CoP}_3$ , and  $x\text{-CoP}_3/\text{C}$  materials embedded on  $\text{C}_{\text{wax}}$  tips after 18-hour constant potential chronoamperometry (CA) HER experiments.

| Sample                      | Co (at%) | P (at%) | O (at%) | C (at%) |
|-----------------------------|----------|---------|---------|---------|
| $\text{CoP}_3$              | 6.8      | 13.8    | 34.6    | 44.8    |
| 25- $\text{CoP}_3/\text{C}$ | 6.2      | 12.2    | 30.5    | 51.1    |
| 10- $\text{CoP}_3/\text{C}$ | 3.8      | 8.4     | 21.0    | 66.8    |
| 5- $\text{CoP}_3/\text{C}$  | 1.0      | 2.3     | 8.7     | 88.0    |

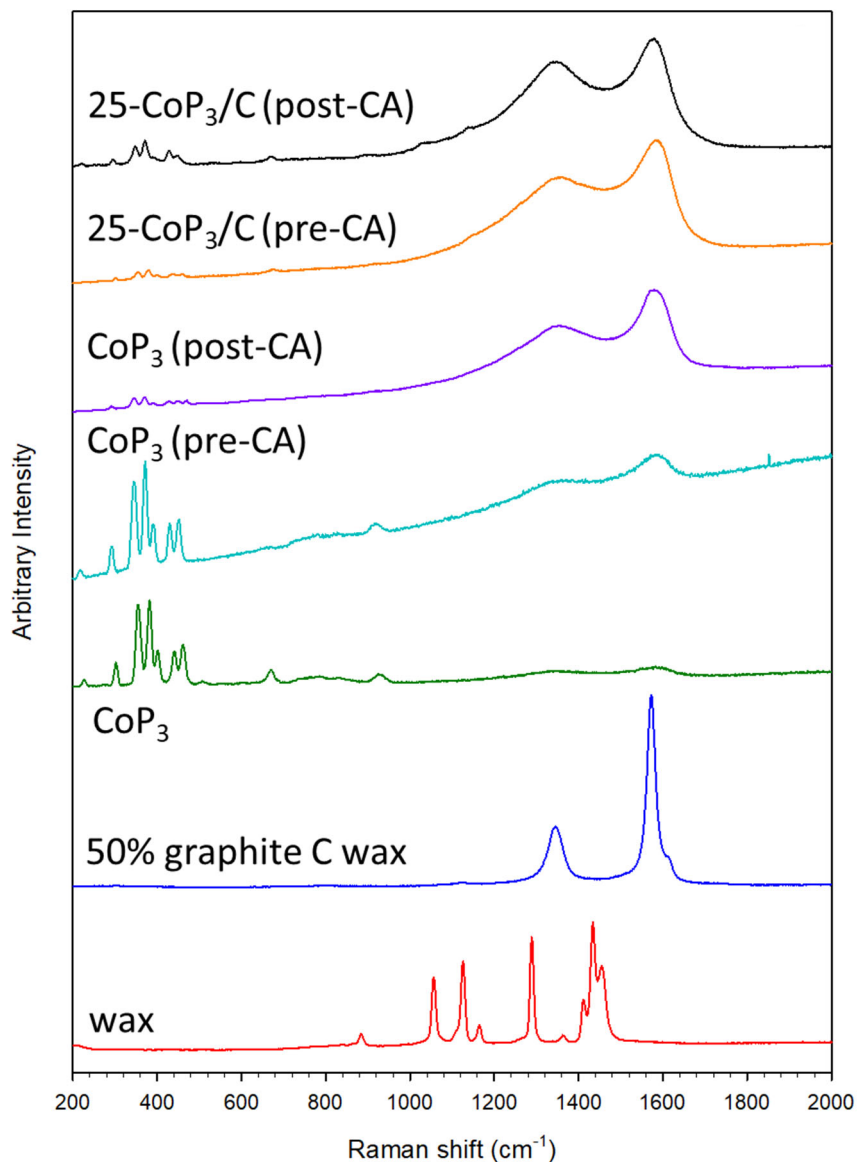

**Figure S25.** Raman spectra of  $\text{CoP}_3$  and 25- $\text{CoP}_3/\text{C}$  materials embedded on  $\text{C}_{\text{wax}}$  tips before 18-hour constant potential chronoamperometry (pre-CA) and after CA (post-CA) HER experiments in the region of  $200\text{-}2000\text{cm}^{-1}$ .

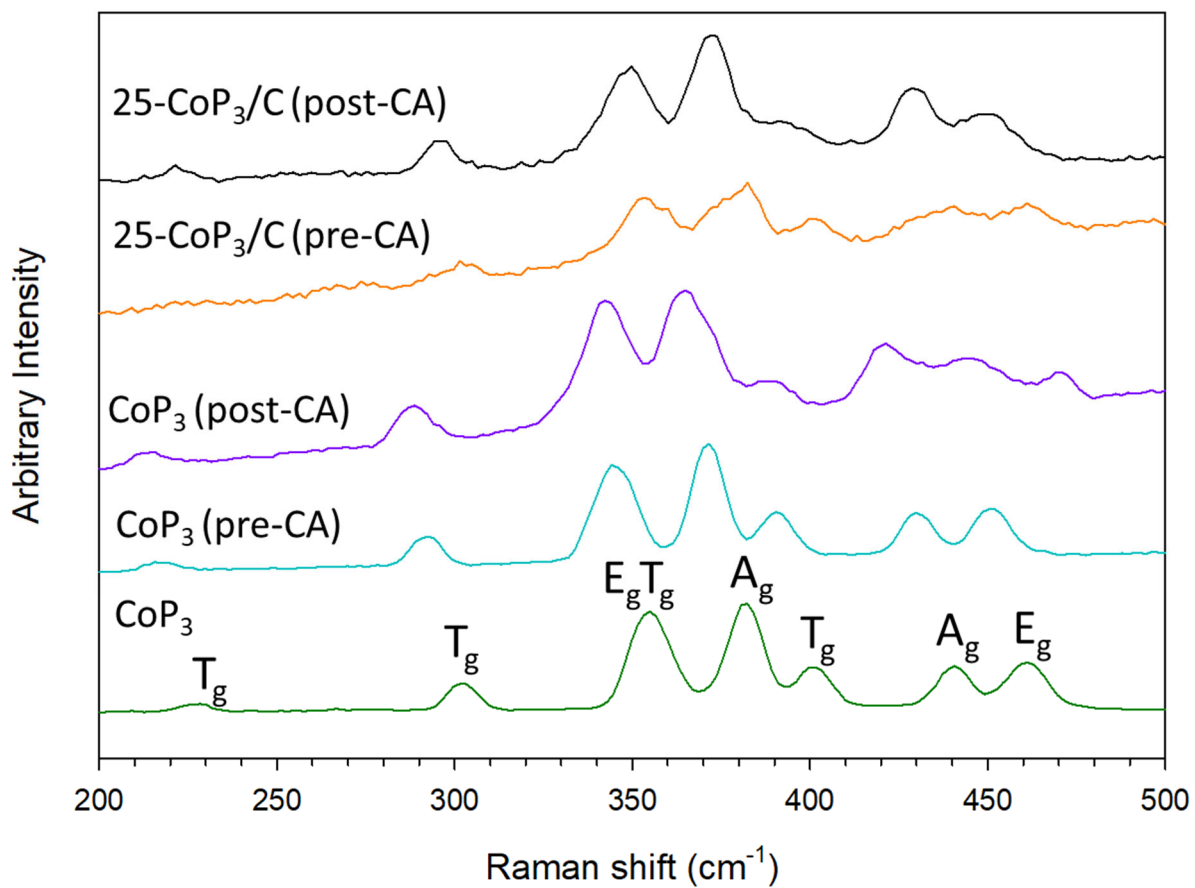

**Figure S26.** Raman spectra of CoP<sub>3</sub> and 25-CoP<sub>3</sub>/C materials embedded C<sub>wax</sub> tips before 18-hour constant potential chronoamperometry (pre-CA) and after CA (post-CA) HER experiments in a zoomed in region of 200-500 cm<sup>-1</sup>.



**Table S2.** Literature comparison table for carbon-supported cobalt phosphides HER in 0.5 M H<sub>2</sub>SO<sub>4</sub>. All current densities are normalized for the geometrical surface area of the electrode. a) Values estimated from plots and graphical data in reference. GCE = Glassy carbon electrode, NRs = Nanorods, NPs = Nanoparticles, CNTs = Carbon nano tubes, NCNT = N-doped CNTs, NCNW = N-doped bundled carbon nanowires, PNC = P, N co-doped carbon, NWs = Nanowires, RGO = Reduced Graphene Oxide, NAs = nanoarrays, CP = Concave Polyhedrons, CFP = Carbon Fiber Paper.

| Supported Cobalt phosphide | Electrode, Geometric area (cm <sup>2</sup> ) | 10 mA/cm <sup>2</sup> (mV) | 20 mA/cm <sup>2</sup> (mV) | Tafel slope (mV/dec) | Ref. |
|----------------------------|----------------------------------------------|----------------------------|----------------------------|----------------------|------|
| Co <sub>2</sub> P NRs      | Ti foil (0.5)                                | -134                       | -167                       | 52                   | 1    |
| Co <sub>2</sub> P NPs      | Ti foil (0.2)                                | -95                        | -109                       | 45                   | 2    |
| Co <sub>2</sub> P/CNT      | GCE (0.09)                                   | -195                       | -219                       | 74                   | 3    |
| Co <sub>2</sub> P/NCNT     | GCE (0.09)                                   | -170 <sup>a</sup>          | -190 <sup>a</sup>          | 62                   | 3    |
| CoP/NCNWs                  | GCE (0.09)                                   | -95                        | -120 <sup>a</sup>          | 50                   | 4    |
| CoP@PNC                    | GCE (0.09)                                   | -84                        | -110 <sup>a</sup>          | 57                   | 4    |
| CoP/CNT                    | GCE (0.09)                                   | -122                       | -180 <sup>a</sup>          | 54                   | 3    |
| CoP/CNT                    | GCE (0.09)                                   | -165                       | -198                       | 68                   | 3    |
| CoP/NCNT                   | GCE (0.09)                                   | -79                        | -99                        | 49                   | 3    |
| CoP NPs                    | Ti foil (0.2)                                | -75                        | -85                        | 50                   | 5    |
| CoP NWs                    | GCE (0.09)                                   | -110                       | -142                       | 54                   | 6    |
| CoP                        | CC (6)                                       | -67                        | -100                       | 51                   | 7    |
| CoP/RGO                    | GCE (0.09)                                   | -157                       | -190 <sup>a</sup>          | 70                   | 8    |
| CoP <sub>2</sub>           | GCE (0.09)                                   | -120                       | -150 <sup>a</sup>          | 73                   | 9    |
| CoP <sub>2</sub> /RGO      | GCE (0.09)                                   | -88                        | -106 <sup>a</sup>          | 50                   | 9    |
| CoP <sub>3</sub> NAs       | CFP (5.4)                                    | -65                        | -100 <sup>a</sup>          | 46                   | 10   |
| CoP <sub>3</sub> CPs       | CFP (0.25)                                   | -78                        | -110 <sup>a</sup>          | 53                   | 11   |

## REFERENCES

1. Z. P. Huang, Z. Z. Chen, Z. B. Chen, C. C. Lv, M. G. Humphrey and C. Zhang, *Nano Energy*, 2014, **9**, 373-382.
2. J. F. Callejas, C. G. Read, E. J. Popczun, J. M. McEnaney and R. E. Schaak, *Chem. Mater.*, 2015, **27**, 3769-3774.
3. Y. Pan, Y. Lin, Y. J. Chen, Y. Q. Liu and C. G. Liu, *J. Mater. Chem. A*, 2016, **4**, 4745-4754.
4. X. R. Tang, N. Li and H. Pang, *Green Energy Environ.*, 2022, **7**, 636-661.
5. E. J. Popczun, C. G. Read, C. W. Roske, N. S. Lewis and R. E. Schaak, *Angew. Chem. Int. Ed.*, 2014, **53**, 5427-5430.
6. P. Jiang, Q. Liu, C. J. Ge, W. Cui, Z. H. Pu, A. M. Asiri and X. P. Sun, *J. Mater. Chem. A*, 2014, **2**, 14634-14640.
7. J. Tian, Q. Liu, A. M. Asiri and X. Sun, *J. Am. Chem. Soc.*, 2014, **136**, 7587-7590.
8. M. Li, X. T. Liu, Y. P. Xiong, X. J. Bo, Y. F. Zhang, C. Han and L. P. Guo, *J. Mater. Chem. A*, 2015, **3**, 4255-4265.
9. J. M. Wang, W. R. Yang and J. Q. Liu, *J. Mater. Chem. A*, 2016, **4**, 4686-4690.
10. T. L. Wu, M. Y. Pi, D. K. Zhang and S. J. Chen, *J. Mater. Chem. A*, 2016, **4**, 14539-14544.
11. T. Wu, M. Pi, X. Wang, D. Zhang and S. Chen, *Phys. Chem. Chem. Phys.*, 2017, **19**, 2104-2110.
